# 1 The *Streptochaeta* genome and the evolution of the 2 grasses

3 Arun Seetharam<sup>1†</sup>, Yunqing Yu<sup>2†</sup>, Sébastien Belanger<sup>2</sup>, Lynn G. Clark<sup>1</sup>, Blake C.  
4 Meyers<sup>2,3</sup>, Elizabeth A. Kellogg<sup>2\*</sup>, Matthew B. Hufford<sup>1\*</sup>

5 <sup>1</sup>Department of Ecology, Evolution, and Organismal Biology, Iowa State University,  
6 Ames, IA, United States.

7 <sup>2</sup>Donald Danforth Plant Science Center, St. Louis, MO, United States.

8 <sup>3</sup>Division of Plant Sciences, University of Missouri-Columbia, Columbia, MO, United  
9 States.

10 †These authors have contributed equally to this work and share first authorship

## 11 \*Correspondence

12 Elizabeth A. Kellogg, [ekellogg@danforthcenter.org](mailto:ekellogg@danforthcenter.org)

13 Matthew B. Hufford, [mhufford@iastate.edu](mailto:mhufford@iastate.edu)

14 Keywords: *Streptochaeta angustifolia*, grass, evolution, spikelet, APETALA2-like, R2R3  
15 MYB, small RNA

16 Word Count: 9,566; 7 Main Figures, 3 Supplemental Figures, 12 Supplemental Tables

## 17 Abstract

18 In this work, we sequenced and annotated the genome of *Streptochaeta angustifolia*,  
19 one of two genera in the grass subfamily Anomochlooideae, a lineage sister to all other  
20 grasses. The final assembly size is over 99% of the estimated genome size, capturing  
21 most of the gene space. *Streptochaeta* is similar to other grasses in the structure of its  
22 fruit (a caryopsis or grain) but has peculiar flowers and inflorescences that are distinct  
23 from those in the outgroups and in other grasses. To provide tools for investigations of  
24 floral structure, we analyzed two large families of transcription factors, AP2-like and  
25 R2R3 MYBs, that are known to control floral and spikelet development in rice and maize  
26 among other grasses. Many of these are also regulated by small RNAs. Structure of the  
27 gene trees showed that the well documented whole genome duplication at the origin of  
28 the grasses ( $\rho$ ) occurred before the divergence of the Anomochlooideae lineage from  
29 the lineage leading to the rest of the grasses (the spikelet clade) and thus that the  
30 common ancestor of all grasses probably had two copies of the developmental genes.  
31 However, *Streptochaeta* (and by inference other members of Anomochlooideae) has  
32 lost one copy of many genes. The peculiar floral morphology of *Streptochaeta* may thus  
33 have derived from an ancestral plant that was morphologically similar to the spikelet-  
34 bearing grasses. We further identify 114 loci producing microRNAs and 89 loci  
35 generating phased, secondary siRNAs, classes of small RNAs known to be influential in  
36 transcriptional and post-transcriptional regulation of several plant functions.

## 37 Introduction

38 The grasses (Poaceae) are arguably the most important plant family to humankind due  
39 to their agricultural and ecological significance. The diversity of grasses may not be  
40 immediately evident given their apparent morphological simplicity. However, the total  
41 number of described species in the family is 11,500+ (Soreng et al., 2017), and more  
42 continue to be discovered and described. Grasses are cosmopolitan in distribution,  
43 occurring on every continent. Estimates vary based on the definition of grassland, but,  
44 conservatively, grasses cover 30% of the Earth's land surface (White et al., 2000;  
45 Gibson, 2009). Grasses are obviously the major component of grasslands, but grass  
46 species also occur in deserts, savannas, forests (both temperate and tropical), sand  
47 dunes, salt marshes and freshwater systems, where they are often ecologically  
48 dominant (Lehmann et al., 2019). The traits that have contributed to the long-term  
49 ecological success of the grasses have also allowed them to be opportunistic colonizers  
50 in disturbed areas and agricultural systems (Linder et al., 2018), where grasses are  
51 often the main crops, providing humanity with greater than 50% of its daily caloric intake  
52 (Sarwar, 2013). The adaptations and morphologies of the grasses that have led to  
53 ecological and agronomic dominance represent major innovations relative to ancestral  
54 species.

55 Monophyly of the grass family is unequivocally supported by molecular evidence, but  
56 grasses also exhibit several uniquely derived morphological or anatomical traits (Grass  
57 Phylogeny Working Group et al., 2001; Kellogg, 2015; Leandro et al., 2018). These  
58 include the presence of arm cells and fusoid cells (or cavities) in the leaf mesophyll; the  
59 pollen wall with channels in the outer wall (intraaxinous channels); the caryopsis fruit  
60 type; and a laterally positioned, highly differentiated embryo. The 30 or so species of the  
61 grass lineages represented by subfamilies Anomochloideae, Pharoideae and  
62 Puelioideae, which are successive sisters to the remainder of the family, all inhabit  
63 tropical forest understories, and also share a combination of ancestral features including  
64 a herbaceous, perennial, rhizomatous habit; leaves with relatively broad,  
65 pseudopetiolate leaf blades; a highly bracteate inflorescence; six stamens in two whorls;  
66 pollen with a single pore surrounded by an annulus; a uniovulate gynoecium with three  
67 stigmas; compound starch granules in the endosperm; and the C<sub>3</sub> photosynthetic  
68 pathway (GPWG 2001). The BOP (Bambusoideae, Oryzoideae, Pooideae) + PACMAD  
69 (Panicoideae, Aristidoideae, Chloridoideae, Micrairoideae, Arundinoideae,  
70 Danthonioideae) clade encompasses the remaining diversity of the family ((Kellogg,  
71 2015); **Figure 1A**). The majority of these lineages adapted to and diversified in open  
72 habitats, evolving relatively narrow leaves lacking both pseudopetioles and fusoid cells  
73 in the mesophyll, spikelets with an array of adaptations for dispersal, and flowers with  
74 three stamens and two stigmas. The annual habit evolved repeatedly in both the BOP  
75 and PACMAD clades, and the 24+ origins of C<sub>4</sub> photosynthesis occurred exclusively  
76 within the PACMAD clade (Grass Phylogeny Working Group II, 2012; Spriggs et al.,  
77 2014).

78 Anomochloideae, a tiny clade of four species classified in two genera (*Anomochloa*  
79 and *Streptochaeta*), is sister to all other grasses (**Figure 1A**; (Kellogg, 2015)). Its  
80 phylogenetic position makes it of particular interest for studies of grass evolution and

81 biology, particularly genome evolution. All grasses studied to date share a whole  
82 genome duplication (WGD), sometimes referred to as  $\rho$ , which is inferred to have  
83 occurred just before the origin of the grasses (Paterson et al., 2004; Wang et al., 2005;  
84 McKain et al., 2016). Not only are ancient duplicated regions found in the grass  
85 genomes studied to date, but the phylogenies of individual gene families often exhibit a  
86 doubly labeled pattern consistent with WGD (Rothfels, 2021). In this pattern we see, for  
87 example, a tree with the topology shown in **Figure 1B**, which points to a WGD before  
88 the divergence of all sequenced grasses, whereas a WGD after divergence of  
89 *Streptochaeta*, would result in the topology shown in **Figure 1C**. While there is some  
90 evidence from individual gene trees that the duplication precedes the divergence of  
91 *Streptochaeta*+*Anomochloa* (Preston and Kellogg, 2006; Preston et al., 2009;  
92 Christensen and Malcomber, 2012; Bartlett et al., 2016; McKain et al., 2016), data are  
93 sparse. Thus, defining the position of the grass WGD requires a whole genome  
94 sequence of a species of Anomochlooideae.

95 Anomochlooideae is also in a key position for understanding the origins of the  
96 morphological innovations of the grass family. All grasses except Anomochlooideae  
97 bear their flowers in tiny clusters known as spikelets (little spikes) (Judziewicz et al.,  
98 1999; Grass Phylogeny Working Group et al., 2001; Kellogg, 2015). Because the  
99 number, position, and structure of spikelets affect the total number of seeds produced  
100 by a plant, the genes controlling their development are a subject of continual research  
101 (e.g., (Whipple, 2017; Huang et al., 2018; Li et al., 2019a, 2019b), to cite just a few). In  
102 contrast to the rest of the family, the flowers in Anomochlooideae are borne in complex  
103 bracteate structures sometimes called "spikelet equivalents" ((Soderstrom and Ellis,  
104 1987; Judziewicz and Soderstrom, 1989; Judziewicz et al., 1999); **Figures 2 and 3**).  
105 These differ from both the conventional monocot flowers of the outgroups and the  
106 spikelets of the remainder of the grasses (i.e., the "spikelet clade"; (Sajo et al., 2008,  
107 2012; Preston et al., 2009; Kellogg et al., 2013)). The structure of the phylogeny  
108 suggests potential interpretations of the origin of the spikelet. One possibility is a  
109 "stepwise" model, in which a set of changes to the genetic architecture of floral  
110 development occurred before the divergence of Anomochlooideae, leading to the  
111 formation of spikelet equivalents; these changes were then followed by a second set of  
112 changes that led to formation of spikelets in the rest of what would become the spikelet  
113 clade. An alternative, which is also consistent with the phylogeny, is a "loss model", in  
114 which all the genes and regulatory architecture needed for making spikelets originated  
115 before the origin of Anomochlooideae, but portions of that architecture were  
116 subsequently lost. Thus, the stepwise model implies that the spikelet equivalents are  
117 somehow intermediate between a standard monocot flower and a grass spikelet,  
118 whereas the loss model implies that the spikelet equivalents are highly modified or  
119 rearranged spikelets. Resolving these hypothetical models will help reveal both how the  
120 unique spikelet structure and the overall floral bauplan in grasses evolved.

121 Of the handful of species in the Anomochlooideae, *Streptochaeta angustifolia* (**Figures**  
122 **2 and 3**) is the most easily grown from seed and an obvious candidate for ongoing  
123 functional genomic investigation. Hereafter in this paper, we will refer to *S. angustifolia*  
124 simply as *Streptochaeta*, and use it as a placeholder for the rest of the subfamily. We  
125 present a draft genome sequence for *Streptochaeta* that captures the gene-space of

126 this species at high contiguity, and we use this genome to assess the position of the  
127 grass WGD. Genes and small RNAs (sRNAs) are annotated. Because of the distinct  
128 floral morphology of *Streptochaeta*, we also investigate the molecular evolution of two  
129 major transcription factor families, APETALA2-like and R2R3 MYB, which are known to  
130 control floral and spikelet structure in other grasses and are regulated by sRNAs.

## 131 **Materials and Methods**

### 132 **Input data**

133 *Streptochaeta* leaf tissue was harvested and used to estimate genome size at the Flow  
134 Cytometry Facility at Iowa State University. DNA was then isolated using Qiagen  
135 DNeasy plant kits. Three Illumina libraries (paired end and 9- and 11-kb mate pair) were  
136 generated from these isolations at the Iowa State University (ISU) DNA Facility. One  
137 lane of 150 bp paired-end HiSeq sequencing (insert size of 180 bp) and one lane of 150  
138 bp mate-pair HiSeq sequencing (9- and 11-kb libraries pooled) were generated, also at  
139 the ISU DNA Facility (**Table S1**). Additionally, for the purpose of contig scaffolding,  
140 Bionano libraries were prepared by first isolating high molecular weight DNA using the  
141 Bionano Prep™ Plant DNA Isolation Kit followed by sequencing using the Irys system.

### 142 **Genome assembly**

143 We used MaSuRCA v2.21 (Zimin et al., 2013) to generate a draft genome of  
144 *Streptochaeta*. The MaSuRCA assembler includes error correction and quality filtering,  
145 generation of super reads, super read assembly, and gap closing to generate more  
146 complete and larger scaffolds. Briefly, the config file was edited to include both paired-  
147 end and mate-pair library data for *Streptochaeta*. The JF\_SIZE parameter was adjusted  
148 to 20,000,000,000 to accommodate the large input file size, and NUM\_THREADS was  
149 set to 128. All other parameters in the config file were left as default. The assembly was  
150 executed by first generating the assemble.sh script using the config file and submitting  
151 to a high-memory node using the PBS job scheduler. We then used Bionano  
152 technology to generate an optical map for the genome and to perform hybrid  
153 scaffolding. All scripts for assembly and downstream analysis are available at:  
154 <https://github.com/HuffordLab/streptochaeta>.

### 155 **Assembly evaluation and post-processing**

156 The Bionano assembly was screened for haplotigs, and additional gaps were filled  
157 using Redundans v0.13a (Pryszcz and Gabaldón, 2016). Briefly, the scaffolds were  
158 mapped to themselves using the LAST v719 alignment program (Kielbasa et al., 2011)  
159 and any scaffold that completely overlapped a longer scaffold with more than 80%  
160 identity was considered redundant and excluded from the final assembly. Additionally,  
161 short read data were aligned back to the hybrid assembly and GapCloser v1.12 from  
162 SOAPdenovo2 (Luo et al., 2012) and SSPACE v3.0 (Boetzer et al., 2011) were run in  
163 multiple iterations to fill gaps. The final reduced, gap-filled assembly was screened for  
164 contamination, using Blobtools v0.9.19 (Laetsch and Blaxter, 2017), and any scaffolds  
165 that matched bacterial genomes were removed. The assembly completeness was then

166 evaluated using BUSCO v3.0.2 (Simão et al., 2015) with the plant profile and standard  
167 assemblathon metrics.

168 To annotate the repeats in the genome, we used EDTA v1.8.3 (Ou et al., 2019) with  
169 default options except for --species, which was set to “others”. The obtained TE library  
170 was then used for masking the genome for synteny analyses. Assembly quality of the  
171 repeat space was assessed based on the LTR Assembly Index (LAI; (Ou et al., 2018)),  
172 which was computed using ltr\_retriever v2.9.0 (Ou and Jiang, 2018) and the EDTA-  
173 generated LTR list.

## 174 Gene prediction and annotation

175 Gene prediction was carried out using a comprehensive method combining *ab initio*  
176 predictions (from BRAKER; (Hoff et al., 2019)) with direct evidence (inferred from  
177 transcript assemblies) using the BIND strategy (Seetharam et al., 2019 and citations  
178 therein). Briefly, RNA-Seq data were mapped to the genome using a STAR (v2.5.3a)-  
179 indexed genome and an iterative two-pass approach under default options in order to  
180 generate BAM files. BAM files were used as input for multiple transcript assembly  
181 programs (Class2 v2.1.7, Cufflinks v2.2.1, Stringtie v2.1.4 and Strawberry v1.1.2) to  
182 assemble transcripts. Redundant assemblies were collapsed and the best transcript for  
183 each locus was picked using Mikado (2.0rc2) by filling in the missing portions of the  
184 ORF using TransDecoder (v5.5.0) and homology as informed by the BLASTX  
185 (v2.10.1+) results to the SwissProtDB. Splice junctions were also refined using  
186 Portcullis (v1.2.1) in order to identify isoforms and to correct misassembled transcripts.  
187 Both *ab initio* and the direct evidence predictions were analyzed with TESorter (Zhang  
188 et al., 2019) to identify and remove any TE-containing genes and with phylostratr  
189 (v0.20; (Arendsee et al., 2019)) to identify orphan genes (*i.e.*, species-specific genes).  
190 As *ab initio* predictions of young genes can be unreliable (Seetharam et al., 2019),  
191 these were excluded. Finally, redundant copies of genes between direct evidence and  
192 *ab initio* predictions were identified and removed using Mikado compare (2.0rc2;  
193 (Venturini et al., 2018)) and merging was performed locus by locus, incorporating  
194 additional isoforms when necessary. The complete decision table for merging is  
195 provided in **Table S2**. After the final merge, phylostratr was run again on the  
196 annotations to classify genes based on their age.

197 Functional annotation was performed based on homology of the predicted peptides to  
198 the curated SwissProt/UniProt set (UniProt Consortium, 2021) as determined by BLAST  
199 v2.10.1+ (Edgar, 2010). InterProScan v5.48-83 was further used to find sequence  
200 matches against multiple protein signature databases.

## 201 Synteny

202 Synteny of CDS sequences for *Streptochaeta* was determined using CoGe (Lyons and  
203 Freeling, 2008), against the genomes *Brachypodium* (International Brachypodium  
204 Initiative, 2010), *Oryza sativa* (Ouyang et al., 2007), and *Setaria viridis* (Mamidi et al.,  
205 2020). SynMap2 (Haug-Baltzell et al., 2017) was employed to identify syntenic regions  
206 across these genomes. Dot plots and chain files generated by SynMap2 under default  
207 options were used for presence-absence analysis. We also performed repeat-masked

208 whole genome alignments using minimap2 (Li, 2018) following the Bioinformatics  
209 Workbook methods ([https://bioinformaticsworkbook.org/dataWrangling/genome-](https://bioinformaticsworkbook.org/dataWrangling/genome-dotplots.html)  
210 [dotplots.html](https://bioinformaticsworkbook.org/dataWrangling/genome-dotplots.html)).

## 211 Identification of APETALA2 (AP2)-like and R2R3 MYB proteins in 212 selected monocots

213 A BLAST database was built using seven grass species including *Streptochoaeta* and  
214 two outgroup monocots. Protein and CDS sequences of the following species were  
215 retrieved from Phytozome 13.0: *Ananas comosus* (Acomosus\_321\_v3), *Brachypodium*  
216 *distachyon* (Bdistachyon\_556\_v3.2), *Oryza sativa* (Osativa\_323\_v7.0), *Spirodela*  
217 *polyrhiza* (Spolyrhiza\_290\_v2), *Setaria viridis* (Sviridis\_500\_v2.1) and *Zea mays*  
218 (*Zmays\_493*\_APGv4). Sequences of *Eragrostis tef* were retrieved from CoGe (id50954)  
219 (VanBuren et al., 2020). Sequences of *Triticum aestivum* were retrieved from Ensembl  
220 Plant r46 (*Triticum\_aestivum*.IWGSCv1) (**Table S3**).

221 AP2 and MYB proteins were identified using BLASTP and hmmscan (HMMER 3.1b2;  
222 <http://hmmer.org/>) in an iterative manner. Specifically, 18 *Arabidopsis* AP2-like proteins  
223 (Kim et al., 2006) were used as an initial query in a blastp search with an E-value  
224 threshold of 1e-10. The resulting protein sequences were filtered based on the  
225 presence of an AP2 domain using hmmscan with an E-value threshold of 1e-3 and  
226 domain E-value threshold of 0.1. The filtered sequences were used as the query for the  
227 next round of blastp and hmmscan until the maximal number of sequences was  
228 retrieved. For MYB proteins, Interpro MYB domain (IPR017930) was used to retrieve  
229 rice MYBs using *Oryza sativa* Japonica Group genes (IRGSP-1.0) as the database on  
230 Gramene Biomart (<http://ensembl.gramene.org/biomart/martview/>). The number of MYB  
231 domains was counted by searching for “Myb\_DNA-bind” in the output of hmmscan, and  
232 82 proteins with two MYB domains were used as the initial query. Iterative blastp and  
233 hmmscan were performed in the same manner as for AP2 except using a domain E-  
234 value threshold of 1e-3.

235 The number of AP2 or MYB domains was again counted in the final set of sequences in  
236 the hmmscan output, and proteins with more than one AP2 domain or two MYB  
237 domains were treated as AP2-like or R2R3 MYB, respectively. To ensure that no  
238 orthologous proteins were missed due to poor annotation in the AP2 or MYB domain,  
239 we performed another round of BLASTP searches, and kept only the best hits. These  
240 sequences were also included in the construction of the phylogenetic trees.

## 241 Construction of phylogenetic trees

242 Protein sequences were aligned using MAFFT v7.245 (Katoh and Standley, 2013) with  
243 default parameters. The corresponding coding sequence alignment was converted  
244 using PAL2NAL v14 (Suyama et al., 2006) and used for subsequent tree construction.  
245 For AP2-like genes, the full length coding sequence alignment was used. For MYB, due  
246 to poor alignment outside of the MYB domain, trimAl v1.2 (Capella-Gutiérrez et al.,  
247 2009) was used to remove gaps and non-conserved nucleotides with a gap threshold (-  
248 gt) of 0.75 and percentage alignment conservation threshold (-con) of 30. A maximum  
249 likelihood tree was constructed using IQ-TREE v1.6.12 (Minh et al., 2020) with default  
250 settings. Sequences that resulted in long branches in the tree were manually removed,

251 and the remaining sequences were used for the final tree construction. Visual formatting  
252 of the tree was performed using Interactive Tree Of Life (iTOL) v4 (Letunic and Bork,  
253 2019).

## 254 RNA isolation, library construction and sequencing

255 We collected tissues from leaf and pistil as well as 1.5 mm, 3 mm and 4 mm anthers.  
256 Samples were immediately frozen in liquid nitrogen and kept at -80°C prior to RNA  
257 isolation. Total RNA was isolated using the PureLink Plant RNA Reagent (Thermo  
258 Fisher Scientific, Waltham, MA, USA). sRNA libraries were published previously (Patel  
259 et al., 2021). RNA sequencing libraries were prepared from the same material using the  
260 Illumina TruSeq stranded RNA-seq preparation kit (Illumina Inc., United States)  
261 following manufacturer's instructions. Parallel analysis of RNA ends (PARE) libraries  
262 were prepared from a total of 20 µg of total RNA following the method described by Zhai  
263 et al. (2014). For all types of libraries, single-end sequencing was performed on an  
264 Illumina HiSeq 2000 instrument (Illumina Inc., United States) at the University of  
265 Delaware DNA Sequencing and Genotyping Center.

## 266 Bioinformatic analysis of small RNA data

267 Using cutadapt v2.9 (Martin, 2011), sRNA-seq reads were pre-processed to remove  
268 adapters (**Table S4**), and we discarded reads shorter than 15 nt. The resulting 'clean'  
269 reads were mapped to the *Streptochoeta* genome using ShortStack v3.8.5 (Johnson et  
270 al., 2016) with the following parameters: -mismatches 0, -bowtie m 50, -mmap u, -  
271 dicernin 19, -dicernmax 25 and -mincov 0.5 transcripts per million (TPM). Results  
272 generated by ShortStack were filtered to keep only clusters having a predominant RNA  
273 size between 20 and 24 nucleotides, inclusively. We then annotated categories of  
274 microRNAs (miRNAs) and phased small interfering RNAs (phasiRNAs).

275 First, sRNA reads representative of each cluster were aligned to the monocot-related  
276 miRNAs listed in miRBase release 22 (Kozomara and Griffiths-Jones, 2014; Kozomara  
277 et al., 2019) using NCBI BLASTN v2.9.0+ (Camacho et al., 2009) with the following  
278 parameters: -strand both, -task blastn-short, -perc identity 75, -no greedy and -  
279 ungapped. Homology hits were filtered and sRNA reads were considered as known  
280 miRNA based on the following criteria: (i) no more than four mismatches and (ii) no  
281 more than 2-nt extension or reduction at the 5' end or 3' end. Known miRNAs were  
282 summarized by family. Small RNA reads with no homology to known miRNAs were  
283 annotated as novel miRNAs using the *de novo* miRNA annotation performed by  
284 ShortStack. The secondary structure of new miRNA precursor sequences was drawn  
285 using the RNAfold v2.1.9 program (Lorenz et al., 2011). Candidate novel miRNAs were  
286 manually inspected, and only those meeting published criteria for plant miRNA  
287 annotations (Axtell and Meyers, 2018) were retained for subsequent analyses. Then,  
288 the remaining sRNA clusters were analyzed to identify phasiRNAs based on ShortStack  
289 analysis reports. sRNA clusters having a "Phase Score" >30 were considered as true  
290 positive phasiRNAs. Genomic regions corresponding to these phasiRNAs were  
291 considered as *PHAS* loci and grouped in categories of 21- and 24-*PHAS* loci referring to  
292 the length of phasiRNAs derived from these loci. Other sRNA without miRNA or  
293 phasiRNA signatures were not considered for analysis or interpretation in this study.

294 To compare sRNAs accumulating in *Streptochoaeta* anthers with other monocots, we  
295 analyzed sRNA samples of *Asparagus officinalis*, *Oryza sativa* and *Zea mays* anthers.  
296 The GEO accession numbers for those datasets are detailed in **Table S3**. We analyzed  
297 these data as described for the *Streptochoaeta* sRNA-seq data.

298 We used the upSetR package (UpSetR; Lex et al., 2014; Conway et al., 2017) to  
299 visualize the overlap of miRNA loci annotated in *Streptochoaeta*, compared to other  
300 species.

## 301 **Bioinformatic analysis of PARE data**

302 We analyzed the PARE data to identify and validate miRNA-target pairs in anther, pistil,  
303 and leaf of *Streptochoaeta* tissues. Using cutadapt v2.9, PARE reads were pre-  
304 processed to remove adapters (**Table S4**) and reads shorter than 15 nt were discarded.  
305 Then, we used PAREsnip2 (Thody et al., 2018) to predict all miRNA-target pairs and to  
306 validate the effective miRNA-guided cleavage site using PARE reads. We ran  
307 PAREsnip2 with default parameters using Fahlgren & Carrington targeting rules  
308 (Fahlgren and Carrington, 2010). We considered only targets in categories 0, 1 and 2  
309 for downstream analysis. We used the EMBL-EBI HMMER program v3.3 (Potter et al.,  
310 2018) to annotate the function of miRNA target genes using the phmmer function with  
311 the SwissProt database.

## 312 **Prediction of miRNA binding sites**

313 Mature miR172 and miR159 sequences from all available monocots were obtained from  
314 miRBase (Kozomara et al., 2019). miRNA target sites in *AP2*-like and *R2R3 MYB*  
315 transcripts were predicted on a web server TAPIR (Bonnet et al., 2010) with their default  
316 settings (score = 4 and free energy ratio = 0.7).

## 317 **Results**

### 318 **Flow Cytometry**

319 Two replicates of flow cytometry estimated the 1C DNA content for *Streptochoaeta* to be  
320 1.80 pg and 1.83 pg, which, when converted to base pairs, yields a genome size of  
321 approximately 1.77 Gb.

### 322 **Genome Assembly and post-processing**

323 Two lanes of short reads (Illumina HiSeq 2500), generated a total of 259 million reads.  
324 Paired-end reads with a fragment size of 250bp were generated at approximately 25.7x  
325 genomic coverage, while the mate-pair libraries with 9- and 11-kb insert size collectively  
326 provided 22.6x coverage. Based on k-mer analysis of these data with the program  
327 Jellyfish (Marçais and Kingsford, 2011), we estimated the repeat content for the  
328 *Streptochoaeta* genome to be approximately 51%. Implementation of the MaSuRCA  
329 assembly algorithm generated an assembly size at 99.8% of the estimated genome  
330 size, suggesting that a large portion of the genome, including repetitive regions were  
331 successfully assembled. The MaSuRCA assembler generated a total of 22,591  
332 scaffolds, with an N50 of 2.4Mb and an L50 of 170.



333 The Bionano data produced an optical map near the expected genome size (1.74 Gb)  
334 with an N50 of 824kb. Through scaffolding with the optical map and collapsing with  
335 Redundans software, the total number of scaffolds dropped to 17,040, improving the  
336 N50 to 2.6Mb and the L50 to 161. A total of 79,165 contigs were provided as input for  
337 Redundans for scaffold reduction (total size 1,898 Mbp). With eight iterations of  
338 haplotype collapsing, the number of scaffolds was reduced to 17,040 (total size 1,796  
339 Mbp). Additional rounds of gap-filling using GapCloser reduced the total number of gaps  
340 (Ns) from 210.13 Mbp to 76.33 Mbp. The improvement in the N50/N90 values with  
341 each iteration is provided in **Table S5**.

342 The final assembly included a total of 3,010 out of 3,278 possible complete Liliopsida  
343 BUSCOs (91.8%). Of these 2,767 (84.4% of the total) were present as a complete  
344 single copy. Only 158 BUSCOs were missing entirely with another 110 present as  
345 fragmented genes. The LAI (LTR Assembly Index) score, which assesses the contiguity  
346 of the assembled LTR retrotransposons, was 9.02, which is somewhat higher than most  
347 short-read-based assemblies (Ou et al., 2018), perhaps due to the relatively low repeat  
348 content of the *Streptochoeta* genome and the use of mate-pair sequencing libraries. Dot  
349 plots of *Streptochoeta* contigs aligned to rice revealed substantial colinearity (**Figure**  
350 **S1**).

### 351 Contamination Detection

352 BlobTools (v0.9.19) (Laetsch and Blaxter, 2017) detected over 95% of the scaffolds  
353 (1742 Mbp) belonging to the Streptophyta clade out of the 1,797 Mbp of assigned  
354 scaffolds (GC mean: 0.54). Approximately 2% of the scaffolds mapped to the  
355 Actinobacteria (36.3Mbp, GC mean: 0.72) and ~0.5% of scaffolds to Chordata (9Mbp,  
356 GC mean: 0.48). Scaffolds assigned to additional clades by BlobTools collectively  
357 comprise ~1.46 Mbp and the remaining 8.47 Mbp of scaffolds lacked any hits to the  
358 database. All bacterial, fungal and vertebrate scaffolds were purged from the assembly.

### 359 Gene prediction and annotation

360 **Direct Evidence predictions:** More than 79% of the total RNAseq reads mapped  
361 uniquely to the *Streptochoeta* genome with <7% multi-mapped reads. Paired-end reads  
362 mapped (uniquely) at a higher rate (88.59%) than the single-end RNAseq (70.38%)  
363 reads. Genome-guided transcript assemblers produced varying numbers of transcripts  
364 across single-end (SE) and paired-end (PE) data as well as various assemblers.  
365 Cufflinks produced the highest number of transcripts (SE: 65,552; PE:66,069), followed  
366 by StringTie (SE: 65,495, PE: 48,111), and Strawberry (SE:68,812; PE:43,882). Class2  
367 generated fewer transcripts overall (PE: 43,966; SE: 13,173). The best transcript for  
368 each locus was picked by Mikado from the transcript assemblies based on its  
369 completeness, homology, and accuracy of splice sites. Mikado also removed any non-  
370 coding (due to lack of ORFs) or redundant transcripts to generate 28,063 gene models  
371 (41,857 transcripts). Mikado also identified 19,135 non-coding genes within the provided  
372 transcript assemblies. Further filtering for transposable-element-containing genes and  
373 genes with low expression reduced the total number of evidence-based predictions to  
374 27,082 genes (40,865 transcripts).

375 **Ab initio predictions:** BRAKER, with inputs including predicted proteins from the direct  
376 evidence method (as a gff3 file produced by aligning proteins to a hard-masked  
377 *Streptochaeta* genome) and the mapped RNA-Seq reads (as a hints file using the bam  
378 file), produced a total of 611,013 transcripts on a soft-masked genome. This was then  
379 subjected to filtering to remove any TE containing genes (244,706 gene models) as well  
380 as genes only found in *Streptochaeta* (466,839 gene models). After removing both of  
381 these classes of genes, which overlapped to an extent, the total number of *ab initio*  
382 predictions dropped to 40,921 genes (44,013 transcripts).

383 **BIND (merging BRAKER predictions with directly inferred genes):** After comparing  
384 BRAKER and direct evidence predictions with Mikado compare: 9,617 transcripts were  
385 exactly identical and direct evidence predictions were retained; 3,263 transcripts from  
386 Mikado were considered incomplete and were replaced with BRAKER models; 13,360  
387 BRAKER models were considered incomplete and replaced with direct evidence  
388 transcripts; 1,884 predictions were adjacent but non-overlapping, and 17,894  
389 predictions were BRAKER-specific and were retained in the final merged predictions.  
390 The final gene set included a total of 44,980 genes (58,917 transcripts).

391 **Functional Annotation:** Functional annotation was informed by homology to the  
392 curated proteins in SwissProt and resulted in the assignment of putative functions for  
393 38,955 transcripts (10,556 BRAKER predictions, and 28,399 direct evidence  
394 predictions). Of the unassigned transcripts, 41 predictions had pfam domain matches,  
395 and 16,918 transcripts had an interproscan hit. Only 3,068 transcripts contained no  
396 additional information in the final GFF3 file.

397 **Phylostrata:** All gene models predicted by the BIND strategy were examined by  
398 classifying the genes based on their presumed age. More than 8% of the total genes  
399 (3,742) were specific to the *Streptochaeta* genus and more than 15% (6,930) of genes  
400 were Poaceae specific. 19% (8,494) of genes' origins could be traced back to cellular  
401 organisms and 15% (6,708) to Eukaryotic genes. The distribution of genes based on  
402 strata and annotation method is provided in **Table S6**.

403 **Transposable Element Annotation:** The repeat annotation performed by the EDTA  
404 package comprised 66.82% of the genome, the bulk of which were LTR class elements  
405 (42.9% in total; Gypsy: 28.16%, Copia: 8.9%, rest: 5.84%), followed by DNA repeats  
406 (23.39% in total; DTC-type: 13.65, DTM-type: 5.78%, rest: 3.96%), and MITE class  
407 repeats (all types 0.54%).

## 408 **Molecular evolution of *APETALA2*-like and R2R3 MYB** 409 **transcription factors**

410 Our highly contiguous assembly in genic regions combined with gene model and  
411 functional annotations allowed: 1) an investigation of gene families known to play a role  
412 in floral development that have potential relevance to the origin of the grass spikelet,  
413 and 2) evaluation of patterns of orthology between genes in *Streptochaeta* and  
414 BOP/PACMAD grasses to clarify the timing of the  $\rho$  WGD. Many transcription factor  
415 families are known to affect spikelet development in the grasses (Hirano et al., 2014;  
416 Whipple, 2017). Of these, *APETALA2* (*AP2*)-like genes control meristem identity and

417 floral morphology, including the number of florets per spikelet (Chuck et al., 1998; Lee  
418 and An, 2012; Zhou et al., 2012; Debernardi et al., 2020). Several *R2R3 MYB* genes  
419 are also known to function in floral organ development, especially in anthers (Zhu et al.,  
420 2008; Aya et al., 2009; Zhang et al., 2010; Schmidt et al., 2013). We explored patterns  
421 of duplication and loss in these gene families between the origin of the grasses and the  
422 origin of the spikelet clade, i.e. before and after the divergence of *Streptochaeta*.

### 423 **APETALA2-like**

424 Previous work on molecular evolution of AP2-like proteins found that the gene family  
425 was divided into two distinct lineages, euAP2 and AINTEGUMENTA (ANT) (Kim et al.,  
426 2006). A Maximum Likelihood tree of AP2-like genes was constructed and rooted at the  
427 branch that separates euAP2 and ANT genes. We found that the euAP2 lineage has  
428 conserved microRNA172 binding sequences except for a few genes in outgroups, one  
429 gene in *Eragrostis tef* and one in *Zea mays* (**Figure 4, Figure S2**).

430 To facilitate the analysis, we name each subclade either by a previously assigned gene  
431 name within the subclade, or the gene sub-family name with a specific number.  
432 *Streptochaeta* orthologs are present in most of the subclades, except *IDS1/Q*, *ANT5*,  
433 *BBM4*, *WRI3* and *basalANT1*, in which the *Streptochaeta* copy is lost (**Figure 4, Figure**  
434 **S2**). The two most common patterns within each subclade are (O,(S,G)) (O, outgroup;  
435 S, *Streptochaeta*; G, other grasses) including *SHAT1*, *ANT1*, *ANT3*, *ANT4*, *BBM1*,  
436 *ANT7*, *ANT8* and *ANT9*, and (S,G) (inferring that outgroup sequence is lost or was not  
437 retrieved by our search) including *BBM3*, *WRI2* and *WRI4* (**Table S7**). These patterns  
438 imply that most grass-duplicated AP2-like genes were lost (*i.e.*, the individual subclades  
439 were returned to single copy) soon after the grass duplication. Some subclades contain  
440 two *Streptochaeta* sequences and one copy in other grasses. These *Streptochaeta*  
441 sequences are either sisters to each other with the *Streptochaeta* clade sister to the  
442 other grasses (O,((S1,S2),G)) (*RSR1*) (**Figure 4, Figure S2, Table S7**), or successive  
443 sisters to a clade of grass sequences (O,(S1,(S2,G))) (*WRI1*) (**Figure 4, Figure S2,**  
444 **Table S7**).

445 In the paired subclades of *IDS1/Q-SNB/SID1*, *ANT5-ANT6*, *BBM4-BBM2* and  
446 *basalANT1-basalANT2*, the grass-duplicated gene pairs were retained, and were also  
447 found to be syntenic pairs based on a syntelog search of the *Brachypodium distachyon*,  
448 *Oryza sativa* or *Setaria viridis* genomes (**Figure 5**). Interestingly, in these subclade  
449 pairs, the *Streptochaeta* orthologs are always sister to one member of the syntenic gene  
450 pair but not the other. Two subclade pairs support a  $\rho$  position before the divergence of  
451 *Streptochaeta*, including *BBM4-BBM2* with a pattern of (G1,(S,G2)) (**Figure 5B**) and  
452 *ANT5-ANT6* with a pattern of (G1,((S1,S2),G2)) (**Figure 5E**). In subclade pairs of  
453 *IDS1/Q-SNB/SID1* and *basalANT1-basalANT2*, two *Streptochaeta* sequences are  
454 successive sisters to one of the grass subclade pairs, forming tree topologies of  
455 (G1,(S1,(S2,G2))) and (O,(G1,(S1,(S2,G2))))), respectively (**Figure 4, Figure S2, Table**  
456 **S7**). These two cases do not fit with a simple history involving  $\rho$  either before or after  
457 the divergence of *Streptochaeta*, and thus indicate a more complex evolutionary history.

## 458 **R2R3 MYB**

459 The maximum likelihood tree of *R2R3 MYBs* was rooted with the CDC5 clade (Jiang  
460 and Rao, 2020). Only subclades with bootstrap values larger than 80 at the node of  
461 *Streptochaeta* were considered for subsequent analysis. Similar to the AP2-like tree, the  
462 most common tree topology within each subclade is (O,(S,G)), found in 16 individual  
463 subclades, followed by (S,G), consisting of 10 subclades. We also found 16 subclades  
464 with other tree topologies either without or with one or two *Streptochaeta* sequences  
465 and one copy of the other grass sequences, including (O,G) (*MYB48*), (O,((S1,S2),G))  
466 (*MYB17*, *MYB21*, *GAMYBL2*, *MYB29* and *GAMYBL1*), ((S1,S2),G) (*MYB78* and  
467 *MYB92*), (O,(S1,(S2,G))), (S1,(S2,G)) (*MYB56*) and ((O,S),G) (*MYB47* and *MYB83*)  
468 (**Table S7**). Conversely, we also found that 20 subclade pairs retained the grass  
469 duplicated gene pairs, although their tree topologies vary based on the position of  
470 *Streptochaeta* and outgroups. Among these, 15 subclade pairs are also found to be  
471 syntenic, including *MYB1-MYB2*, *MYB6-MYB7*, *MYB35-MYB36*, *MYB42-MYB43*,  
472 *MYB49-MYB50*, *MYB51-MYB52*, *MYB53-MYB54*, *MYB62-MYB63*, *MYB65-MYB66*,  
473 *SWAM1-SWAM2*, *MYB75-MYB76*, *MYB86-MYB87*, *MYB93-MYB94*, *MYB103-MYB104*  
474 and *MYB105-FDL1* (**Figure 5 and Figure 6, Figure S3, Table S7**). Together, these  
475 results indicate that a subset of grass MYB clades have expanded due to the grass  
476 WGD.

477 Among the above subclade pairs that retain both grass sequences, we found that one  
478 subclade pair, *MYB53-MYB54* with tree topology of (O,(S1,S2),(G1,G2)), supports  $\rho$   
479 having occurred after the divergence of *Streptochaeta* (**Figure 5F**). Conversely, we  
480 found 10 subclades supporting a  $\rho$  position before the divergence of *Streptochaeta*. The  
481 subclade *MYB93-MYB94* includes three *Streptochaeta* sequences, one sister to one of  
482 the grass clades and the other two sister to each other and sister to the other grass  
483 clade, forming a tree topology of (O,((S1,G1),(S2,S3),G2)) (**Figure 5A**). In the other 9  
484 subclade pairs, one or two *Streptochaeta* sequences are sister to one of the grass  
485 syntenic gene pairs but not the other (**Figure 5B-5E**). In subclade pairs *MYB86-MYB87*  
486 and *MYB34-MYB36*, one *Streptochaeta* sequence is sister to one of the grass clades,  
487 showing (G1,(S,G2)) and (O,(G1,(S,G2))), respectively (**Figure 5B and 5C**). We  
488 observed more subclades with two sequences of *Streptochaeta*, either showing  
489 (O,(G1,((S1,S2),G2))) in *MYB6-MYB7* and *SWAM1* and *SWAM2*, or (G1,((S1,S2),G2))  
490 in *MYB42-MYB43*, *MYB51-MYB52*, *MYB65-MYB66*, *MYB75-MYB76* and *MYB105-*  
491 *FDL1*.

492 A few subclade pairs have tree topologies that do not support a  $\rho$  position either before  
493 or after the divergence of *Streptochaeta*, including (O,(S1,(S2,(G1,G2)))) (*MYB1-MYB2*  
494 and *MYB62-MYB63*), (S1,(G1,(S2,G2))) (*MYB22-MYB23*) and ((O,S),(G1,G2)) (*MYB11-*  
495 *MYB12*) (**Table S7**). In other cases, the *Streptochaeta* ortholog is either lost, or  
496 positioned within the grass clades (**Table S7**). This may indicate a complex evolutionary  
497 history of *Streptochaeta*. Alternatively, it may be an artifact due to the distant outgroups  
498 used in this study and poor annotation of some sequences.

499 Taken together, both the *AP2*-like and *R2R3 MYB* trees support the inference of  $\rho$   
500 before the divergence of *Streptochoaeta* (12 subclades) over  $\rho$  after the divergence of  
501 *Streptochoaeta* (1 subclade) (**Figure 5**), consistent with previous findings (McKain et al.,  
502 2016). In addition, our study suggests that *Streptochoaeta* has often lost one of the  
503 syntenic paralogs and sometimes has its own duplicated gene pairs.

## 504 Annotation of miRNAs and validation of their targets

505 sRNAs are important transcriptional and post-transcriptional regulators that play a role  
506 in plant development, reproduction, stress tolerance, etc. Identification of the  
507 complement of these molecules in *Streptochoaeta* can inform our understanding of  
508 distinguishing features of grass and monocot genomes. To annotate miRNAs present  
509 in the *Streptochoaeta* genome, we (i) sequenced sRNAs from leaf, anther and pistil  
510 tissues, (ii) compared miRNAs present in anthers to those of three other representative  
511 monocots (rice, maize and asparagus), and (iii) validated gene targets of these  
512 miRNAs. In total, 185.3 million (M) sRNA reads were generated (115.6 M, 33.0 M, and  
513 36.7 M reads for anther, pistil, and leaf tissues, respectively) from five sRNA libraries.  
514 Overall, we annotated 114 miRNA loci, of which 98 were homologous to 32 known  
515 miRNA families and 16 met strict annotation criteria for novel miRNAs (**Table S8**; **Table**  
516 **S9**; **Table S10**). Most miRNAs from these loci (85; 90.4%) accumulated in all three  
517 tissues (**Figure 7**). We found a sub-group (8 miRNAs; 7.0%) of miRNAs abundant in  
518 anthers but not in the pistil or leaf tissues. Among these miRNAs, we found one copy  
519 each of miR2118 and miR2275, miRNAs known to function in the biogenesis of  
520 reproductive phasiRNAs (Johnson et al., 2009; Zhai et al., 2015). Comparing known  
521 miRNA families expressed in anthers of *Streptochoaeta* with three other monocots, we  
522 observed that only 25.4% of families overlapped between species. The large number of  
523 miRNA families detected exclusively in anthers of asparagus (29.9%) and rice (17.9%)  
524 perhaps explains the small overlap between species.

525 We generated parallel analysis of RNA ends (PARE) libraries to identify and validate the  
526 cleavage of miRNA-target pairs in anther, pistil and leaf of *Streptochoaeta* tissues (**Table**  
527 **S11**; **Table S12**). Overall, we validated 58, 55 and 66 gene targets in anther, pistil and  
528 leaf of *Streptochoaeta* tissues, respectively. Half of these targets were detected in all  
529 tissues (51.9%) while 7 (8.6%), 4 (4.9%) and 14 (17.3%) targets were validated  
530 exclusively in anther, pistil, and leaf tissues, respectively, and remaining set of targets  
531 were found in combinations of two tissues. Among the validated targets, we found  
532 targets for three novel miRNAs, supporting their annotation. As an example, 184 reads  
533 validated the cleavage site of one novel miRNA target gene (*strangu\_031733*), which is  
534 homologous to the *GPX6* gene (*At4g11600*) known to function in the protection of cells  
535 from oxidative damage in *Arabidopsis* (Rodriguez Milla et al., 2003). Among targets of  
536 known miRNAs, we validated the cleavage site of 6 and 4 genes encoding members of  
537 AP2 and MYB transcription factor families, respectively (**Figure S2**; **Figure S3**). We  
538 observed that miR172 triggered the cleavage of AP2 genes in all tissues, consistent  
539 with the well-described function of this miRNA (Aukerman and Sakai, 2003; Lauter et  
540 al., 2005; Chuck et al., 2007, 2008). We also showed that miR159 triggered the

541 cleavage of transcripts of four *MYB* genes, homologous to rice *GAMYB* genes, in leaf  
542 and pistil tissues but not in anther.

## 543 **Expression of phasiRNAs is not limited to male reproductive** 544 **tissues**

545 We used the same sRNA libraries and annotated phasiRNAs expressed in the  
546 *Streptochoeta* genome, and compared the abundances of these loci to asparagus,  
547 maize, and rice. Overall, we detected a total of 89 phasiRNA loci (called *PHAS* loci)  
548 including 71 21-*PHAS* and 18 24-*PHAS* loci (**Table S8**). We made three observations of  
549 note: First, we observed a switch in the ratio of 21-*PHAS* to 24-*PHAS* locus number  
550 comparing asparagus (< 1), a member of Asparagaceae, to grass species (> 1;  
551 Poaceae). Second, the number of genomic *PHAS* loci increased, in Poaceae species,  
552 from *Streptochoeta* to both maize and rice. Third, several *PHAS* loci were also  
553 expressed in the pistil and leaf tissues -- female reproductive and vegetative tissues,  
554 respectively. Overall, a total of 23 (32%) 21-*PHAS* loci and 11 (61%) 24-*PHAS* loci were  
555 expressed in the pistil with a median abundance of 32.9% and 12.3% respectively  
556 compared to phasiRNAs detected in anther tissue. Similarly, 22 (31%) 21-*PHAS* loci  
557 and 10 (56%) 24-*PHAS* loci were detected in leaf tissue with a median abundance of  
558 53.3% and 13.2% respectively compared to phasiRNAs detected in anthers. This  
559 expression of 24-nt phasiRNAs in vegetative tissues is unusual.

## 560 **Discussion**

### 561 **Genome assembly, contiguity, structure.**

562 The *Streptochoeta* genome presented here provides a resource for comparative  
563 genomics, genetics, and phylogenetics of the grass family. It represents the subfamily  
564 Anomochlooideae, which is sister to all other grasses and thus is equally  
565 phylogenetically distant to the better-known species rice, Brachypodium, sorghum, and  
566 maize (Clark et al., 1995; Grass Phylogeny Working Group et al., 2001; Saarela et al.,  
567 2018). The genome assembly captures nearly all of the predicted gene space at high  
568 contiguity (complete BUSCOs 91.8%, liliopsida\_odb10 profile, n = 3278), with the  
569 genome size matching predictions based on flow cytometry. The genome-wide LTR  
570 Assembly Index (LAI), for measuring the completeness of intact LTR elements, was  
571 9.02. This score classifies the current genome as “draft” in quality, and is on par with  
572 other assemblies using similar sequencing technology (Apple (v1.0) (Velasco et al.,  
573 2010), Cacao (v1.0) (Argout et al., 2011)).

574 Our comprehensive annotation strategy identified a high proportion of genes specific to  
575 the genus *Streptochoeta*, also known as orphan genes (3,742). Many previous studies  
576 have indicated that orphan genes may comprise 3-10% of the total genes in plants and  
577 can, in certain species, range up to 30% of the total (Arendsee et al., 2014). Overall the  
578 average gene length (3,956bp), average mRNA length (3,931bp) and average CDS  
579 length (1,060bp) are similar to other grass species queried in Ensembl (Howe et al.,  
580 2021).

581 Previous phylogenetic work based on transcriptomes (McKain et al., 2016) or individual  
582 gene tree analyses (Preston and Kellogg, 2006; Whipple et al., 2007; Christensen and  
583 Malcomber, 2012; McKain et al., 2016)) suggested that *Streptochaeta* shared the same  
584 WGD ( $\rho$ ) as the rest of the grasses but that it might also have its own duplication.  
585 Among the large sample (200) of clades in the transcriptome gene trees from McKain et  
586 al. (2016), 44% of these showed topologies consistent with  $\rho$  before the divergence of  
587 *Streptochaeta* (e.g., topologies shown in **Figure 2 Ai, Aii, and Aiv**), with 39% being  
588 ambiguous (**Figure 2 Aiii, Bii**). Fewer than 20% of the clades identified by (McKain et  
589 al., 2016) had topologies consistent with the  $\rho$  duplication occurring after the divergence  
590 of *Streptochaeta* (**Figure 2 Bi**).

591 *Streptochaeta* contigs show good collinearity with the rice genome, a finding that is also  
592 consistent with the hypothesis that  $\rho$  preceded the divergence of *Streptochaeta* as  
593 suggested by most of our gene trees. Mapping the *Streptochaeta* contigs against  
594 themselves also hints at another *Streptochaeta*-specific duplication, although the timing  
595 of this duplication cannot be inferred purely from the dot plot. Analysis of individual  
596 clades within large gene families (see below) support the same conclusion.

597 Analyzing the *AP2-like* and *MYB* subclades through the lens of grass WGD events, we  
598 found 12 and 1 cases supporting  $\rho$  before and after the divergence of *Streptochaeta* ,  
599 thus confirming previous transcriptomic data (Preston and Kellogg, 2006; Whipple et al.,  
600 2007; Christensen and Malcomber, 2012; McKain et al., 2016). We also found that  
601 *Streptochaeta* often lost one copy of the syntenic paralogs, not only in MADS-box genes  
602 (Preston and Kellogg, 2006; Christensen and Malcomber, 2012) but also in *AP2-like*  
603 and *R2R3 MYB* families. In addition, there are often two *Streptochaeta* sequences sister  
604 to a grass clade (**Figure 5, Table S7**), underscoring the fact that *Streptochaeta* does  
605 not simply represent an ancestral state for polarization of grass evolution, but has its  
606 own unique evolutionary history.

607 Genome structure and phylogenetic trees of *Streptochaeta* genes and their orthologs  
608 support the “loss model” shown in **Figure 1B iv**, in which many of the genes known to  
609 control the structure of the grass spikelet were found in an ancestor of both  
610 *Streptochaeta* and the spikelet clade, but have then been lost in *Streptochaeta*. This  
611 provides circumstantial evidence that the common ancestor of all grasses - including  
612 *Streptochaeta* (and *Anomochloa*) - might have borne its flowers in spikelets, and the  
613 truly peculiar “spikelet equivalents” of Anomochlooideae are indeed highly modified.

## 614 **Complex evolutionary history of *Streptochaeta* may contribute to its** 615 **unique characteristics**

616 Previous studies have focused on the evolution of MADS-box genes in shaping grass  
617 spikelet development. For example, the A-class gene in flower development  
618 *FRUITFULL* (*FUL*) duplicated at the base of Poaceae before the divergence of  
619 *Streptochaeta*, but *FUL1/VRN1* in *Streptochaeta* was subsequently lost (Preston and  
620 Kellogg, 2006). Similarly, paralogous *LEAFY HULL STERILE1* (*LHS1*) and *Oryza sativa*  
621 *MADS5* duplicated at the base of Poaceae, but *Streptochaeta* has only one gene sister

622 to the *LHS1* clade (Christensen and Malcomber, 2012). However, in another study on  
623 the B-class MADS-box gene *PISTILLATA* (*PI*), *Streptochaeta* has orthologs in both the  
624 *PI1* and *PI2* clades (Whipple et al., 2007).

625 Here we focused on *AP2*-like and *R2R3 MYB* transcription factor families, both of which  
626 include members regulating inflorescence and spikelet development. The *euAP2*  
627 lineage of the *AP2*-like genes determines the transition from spikelet meristem to floral  
628 meristem (Hirano et al., 2014). In the maize mutant *indeterminate spikelet1* (*ids1*), extra  
629 florets are formed within the spikelets in both male and female flowers (Chuck et al.,  
630 1998). The double mutant of *ids1* and its syntenic paralog *sister of indeterminate*  
631 *spikelet1* (*sid1*) produce repetitive glumes (Chuck et al., 2008). Consistently, the rice  
632 mutants of *SUPERNUMERARY BRACT* (*SNB*), which is an ortholog of *SID1*, also  
633 exhibit multiple rudimentary glumes, due to the delay of transition from spikelet  
634 meristem to floral meristem. Such mutant phenotypes are somewhat analogous to the  
635 *Streptochaeta* “spikelet equivalents”, which possess 11 or 12 bracts. In situ  
636 hybridization studies on *FUL* and *LHS1* showed that the outer bracts 1-5 resemble the  
637 expression pattern of glumes in other grass spikelets, while inner bracts 6-8 resemble  
638 the expression pattern of lemma and palea (Preston et al., 2009). Our phylogenetic  
639 analysis suggests that the ortholog of *IDS1* in *Streptochaeta* is lost (**Figure 4, Figure**  
640 **S2**). Instead, *Streptochaeta* has two sequences orthologous to *SID1/SNB*, and these  
641 two sequences are successively sister to each other with a tree pattern of  
642 (G1,(S1,(S2,G2)) in *IDS1/Q-SID1/SNB* subclade pairs, leaving the evolutionary history  
643 of *Streptochaeta* ambiguous (**Figure 4, Figure S2, Table S7**). Both *IDS1* and *SID1* are  
644 targets of miRNA172 in maize (Chuck et al., 2007, 2008). Our PARE analyses did  
645 validate the cleavage of all six *Streptochaeta euAP2* by miRNA172 (**Table S12**),  
646 demonstrating that the miRNA172 post-transcriptional regulation of *euAP2* is functional  
647 in *Streptochaeta*. Detailed spatial gene expression analysis may further reveal whether  
648 and how these *euAP2* genes contribute to floral structure in *Streptochaeta*.

649 *BABY BOOM* genes (*BBMs*) belong to the euANT lineage of the *AP2*-like genes, and  
650 are well known for their function in induction of somatic embryogenesis (Boutillier et al.,  
651 2002) and application for in vitro tissue culture (Lowe et al., 2016). Ectopic expression  
652 of *BBM* in *Arabidopsis* and *Brassica* results in pleiotropic defects in plant development  
653 including changes in floral morphology (Boutillier et al., 2002). The grasses have four  
654 annotated *BBMs*, although it is not known whether other *ANT* members share similar  
655 functions. *BBM4* and *BBM2* subclades appeared to be duplicated paralog pairs due to  
656 the grass WGD. Similar to the cases in previous studies (Preston and Kellogg, 2006;  
657 Christensen and Malcomber, 2012), *Streptochaeta* has apparently lost its *BBM4* copy  
658 and contains one copy in the *BBM2* subclade (**Figure 4, Figure 5, and Figure S2**).

659 *R2R3 MYB* is a large transcription factor family, some of which are crucial for anther  
660 development. The rice *carbon starved anther* (*csa*) mutants show decreased sugar  
661 content in floral organs including anthers, resulting in a male sterile phenotype (Zhang  
662 et al., 2010). *DEFECTIVE in TAPETAL DEVELOPMENT and FUNCTION1* (*TDF1*) is  
663 required for tapetum programmed cell death (Zhu et al., 2008; Cai et al., 2015). *GAMYB*  
664 positively regulates GA signaling by directly binding to the promoter of GA-responsive  
665 genes in both *Arabidopsis* and grasses (Tsuji et al., 2006; Aya et al., 2009; Alonso-Peral



666 et al., 2010). *OsGAMYB* is highly expressed in stamen primordia, tapetum cells of the  
667 anther and aleurone cells, and its expression is regulated by miR159. Nonfunctional  
668 mutants of *OsGAMYB* are defective in tapetum development and are male sterile  
669 (Kaneko et al., 2004; Tsuji et al., 2006). We found conserved miRNA159 binding sites in  
670 *GAMYBs* and its closely related subclades, including *MYB27*, *MYB28*, *GAMYBL2*,  
671 *MYB29*, *GAMYBL1*, *MYB30* and *GAMYB* (**Figure 4**). Our PARE analyses also validated  
672 the cleavage of *Streptochoeta GAMYB* and *GAMYBL1* in leaf and pistil tissues but not  
673 in anthers, suggesting the expression of *Streptochoeta GAMYB* and *GAMYBL1* may be  
674 suppressed by miR159 in tissues other than anthers, at least at the developmental  
675 stages we investigated (**Table S12**). *Streptochoeta* has two sequences in each of the  
676 *GAMYBL2*, *MYB29*, *GAMYBL1* and *GAMYB* clades, either with a tree topology of  
677 (O,(S1,S2),G) in *GAMYBL2*, *MYB29* and *GAMYBL1*, or a tree topology of  
678 (O,(S1,(S2,G))) in *GAMYB* (**Figure 6**, **Figure 4**, **Table S7**). This again indicates that  
679 *Streptochoeta* has a complex duplication history.

## 680 **A survey of small RNAs in the *Streptochoeta* genome**

681 miRNAs are major regulators of mRNA levels, active in pathways important to plant  
682 developmental transitions, biotic and abiotic stresses, and others. miRNAs generally act  
683 as post-transcriptional regulators by homology-dependent cleavage of target gene  
684 transcripts, when loaded to the RNA-induced silencing complex (RISC). Plant genomes  
685 encode a variety of sRNAs that can act in a transcriptional or post-transcriptional  
686 regulation mode. In this paper, we focused on miRNA and phasiRNA. The list of miRNA  
687 annotated in this study is likely incomplete because the *Streptochoeta* sRNA-seq data  
688 were limited to anther, pistil and leaf tissues, and would miss miRNAs expressed  
689 specifically in other tissues/cell types or at growth conditions not sampled. Thus,  
690 miRNAs missed in our data may well be encoded in the *Streptochoeta* genome. That  
691 being said, our miRNA characterization provides a starting point with which to describe  
692 *Streptochoeta* miRNAs, and our sequencing depth and tissue diversity was likely  
693 sufficient to identify many if not the majority of miRNAs encoded in the genome.

694 Phased short interfering RNAs (phasiRNAs) are 21-nt or 24-nt sRNAs generated from  
695 the recursive cleavage of a double-stranded RNA from a well-defined terminus; these  
696 transcripts define their precursor *PHAS* loci (Axtell and Meyers, 2018). Reproductive  
697 phasiRNAs are a subset abundant in anthers and in some cases essential to male  
698 fertility. Genomes of grass species are particularly rich in reproductive *PHAS* loci (Patel  
699 et al., 2021), expressed in anthers but not in female reproductive tissues or vegetative  
700 tissues. Previous species studies identified hundreds of *PHAS* loci in anthers of maize  
701 (Zhai et al., 2015) to thousands of *PHAS* loci in rice (Fei et al., 2016), barley (Bélanger  
702 et al., 2020) and bread wheat (Bélanger et al., 2020; Zhang et al., 2020). Additionally,  
703 work in maize (Teng et al., 2020) and rice (Fan et al., 2016) showed that 21-nt and 24-  
704 nt phasiRNAs are essential to ensure proper development of meiocytes and to  
705 guarantee male fertility under normal growth conditions. However, *Streptochoeta* has a  
706 different internal anatomy than the rest of the grasses. Specifically, anthers in  
707 *Streptochoeta* are missing the “middle layer” between the endothecium and the tapetum  
708 (Sajo et al., 2009, 2012) such that the microsporangium has only three cell layers.

709 Given that most of our data (> 100 M reads) were collected from anthers, we have good  
710 resolution for annotation of phasiRNAs in this tissue. We characterized their  
711 absence/presence in the three-layer anthers of *Streptochaeta*. We annotated tens of  
712 *PHAS* loci in *Streptochaeta* showing that anthers express phasiRNAs even in the  
713 absence of the middle layer. Likewise, in maize, Zhai et al. (2015) showed that the  
714 miRNA and phasiRNA precursors are dependent on the epidermis, endothecium, and  
715 tapetum, and the phasiRNAs accumulate in the tapetum and meiocytes, so the middle  
716 layer is apparently not involved. We observed a shift in the ratio of 21-*PHAS* to 24-  
717 *PHAS* loci from asparagus (< 1), an Asparagaceae, to grass species (> 1), although the  
718 implications of this shift are as yet unclear.

719 We also observed that several 21-nt and 24-nt phasiRNAs accumulate in either pistil or  
720 leaf tissues, inconsistent with prior results. A small number of 21-nt *PHAS* loci are likely  
721 trans-acting-siRNA-generating (*TAS*) loci, important in vegetative tissues, but typically  
722 there are only a few *TAS* loci per genome (Xia et al., 2017), not the 20 loci that we  
723 observed. Additionally, we found no previous reports of 24-nt phasiRNAs accumulating  
724 in vegetative tissues or female reproductive tissues.

## 725 **Utility of *Streptochaeta* for understanding grass evolution and** 726 **genetics**

727 The four species of Anomochlooideae are central to understanding the evolution of the  
728 grasses and the many traits that make them unique. We have highlighted the unusual  
729 floral and inflorescence morphology of *Streptochaeta* and have compared it to grass  
730 spikelets, but *Streptochaeta* can also illuminate the evolution and genetic basis of other  
731 important traits. It is common to compare traits between members of the BOP clade  
732 (e.g. *Oryza*, *Brachypodium*, or *Triticum*) and the PACMAD clade (e.g. *Zea*, *Sorghum*,  
733 *Panicum*, *Eragrostis*), but, because these comparisons involve two sister clades, it is  
734 impossible to determine whether the BOP or the PACMAD clade character state is  
735 ancestral. *Streptochaeta* functions as an outgroup in such comparisons and can help  
736 establish the direction of change. Here, we highlight just a few of the traits whose  
737 analysis may be helped in future studies by reference to *Streptochaeta* and its genome  
738 sequence.

739 Drought intolerance, shade tolerance. The grasses, including not only  
740 Anomochlooideae, but also Pharoideae and Puelioideae, the three subfamilies that are  
741 successive sister groups of the rest of the family, appear to have originated in  
742 environments with low light and high humidity (Edwards and Smith, 2010; Gallaher et  
743 al., 2019). The shift from shady, moist habitats to open, dry habitats where most grass  
744 species are now found promises insights into photosynthesis and water use efficiency,  
745 among other physiological traits.

746 *Streptochaeta*, like other forest grasses, has broad, spreading leaf blades and a  
747 pseudopetiole that results in higher leaf angle and increased light interception (Gallaher  
748 et al., 2019). Leaf angle is an important agronomic trait, with selection during modern  
749 breeding often favoring reduced leaf angle to maximize plant density and yield (Liu et  
750 al., 2019; Mantilla-Perez et al., 2020). A close examination of *Streptochaeta* may  
751 provide insight into how leaf angle is controlled in diverse grasses. Leaf width in maize

752 is controlled particularly by the *WOX3*-like homeodomain proteins *NARROWSHEATH1*  
753 (*NS1*) and *NS2*, which function in cells at the margins of leaves (Scanlon et al., 1996;  
754 Conklin et al., 2020). Duplication patterns and expression of *NS1* and *NS2* genes in the  
755 *Streptochaeta* genome could test whether the models developed for maize were  
756 present in the earliest of the grasses.

757 Leaf anatomy. The grass outgroup *Joinvillea* develops colorless cells in the mesophyll  
758 (Leandro et al., 2018). These appear to form from the same ground tissue that is  
759 responsible for the cavity-like “fusoid” cells in Anomochlooideae, Pharoideae, and  
760 Puelioideae as well as the bambusoid grasses. These cells, which appear to be a  
761 shared derived character for the grasses, form from the collapse of mesophyll cells and  
762 may play a role in the synthesis and storage of starch granules early in plant  
763 development (Leandro et al., 2018). While the genetic basis of leaf anatomy is, at the  
764 moment, poorly understood, *Streptochaeta* will be a useful system for understanding the  
765 development of fusoid cells in early diverging and other grasses.

766 Grass leaves also contain silica bodies in the epidermis; the vacuoles of these cells are  
767 filled with amorphous silica (SiO<sub>2</sub>). In *Streptochaeta* the silica bodies are a distinctive  
768 shape, being elongated transverse to the long axis of the blade (Judziewicz and  
769 Soderstrom, 1989). The genetic basis of silica deposition has been studied in rice (Yu et  
770 al., 2020) and the availability of the *Streptochaeta* genome now permits examination of  
771 the evolution of these genes in the grasses.

772 Anther and pollen development. *Streptochaeta* differs from most other grasses (and  
773 indeed some Poales as well) in details of its anthers and pollen development, and the  
774 current genome provides tools for comparative analyses. The sRNAs described above  
775 are produced in the epidermis, endothecium and tapetum of most grasses and we  
776 presume they are also produced in those tissues in *Streptochaeta*. In all grasses except  
777 Anomochlooideae and Pharoideae, the microsporangium has four concentric layers of  
778 cells - the epidermis, the endothecium, the middle layer, and the tapetum - which  
779 surround the archesporial cells (Walbot and Egger, 2016). Cells in the middle layer and  
780 the tapetum are sisters, derived from division of a secondary parietal cell. The inner  
781 walls of the endothelial cells also mature to become fibrous (Artschwager and McGuire,  
782 1949; Furness and Rudall, 1998). In *Streptochaeta* and *Pharus*, however, the middle  
783 layer is absent (Sajo et al., 2007, 2009, 2012) and the endothelial cells lack fibrous  
784 thickenings. It is tempting to speculate that the middle layer may have a role in  
785 coordinating maturation of the endothecium. Lack of the middle layer is apparently  
786 derived within *Streptochaeta* and *Pharus*. In known mutants of maize and rice, loss of  
787 the middle layer leads to male sterility (Walbot and Egger, 2016) so the functional  
788 implications of its absence in *Streptochaeta* are unclear.

789 Development of microsporangium layers may also be related to the position of  
790 microspores inside the locule. In most grasses, the microspores and mature pollen  
791 grains form a single layer adjacent to the tapetum, with the pore of the pollen grain  
792 facing the tapetum, unlike many non-grasses in which the microsporocytes fill the locule  
793 and have a haphazard arrangement. The condition in *Streptochaeta* is unclear, with  
794 contradictory reports in the literature (Kirpes et al., 1996; Sajo et al., 2009, 2012).

795 The exine, or outer layer, of grass pollen is distinct from that of its close relatives due to  
796 the presence of channels that pass through the exine. While controls of this particular  
797 aspect of the pollen wall are unknown in the grasses, we find that *Streptochaeta* and its  
798 grass sisters have several GAMYB genes, which are known to be involved in exine  
799 formation in rice (Aya et al., 2009) and to have played a role more broadly in  
800 reproductive processes, including microspore development in early vascular plants (Aya  
801 et al., 2011).

802 Chromosome number in the early grasses. Estimates of the ancestral grass  
803 chromosome number and karyotype have reached different conclusions (e.g., (Salse et  
804 al., 2008; Murat et al., 2010; Wang et al., 2016)). Genomes of *Streptochaeta* and other  
805 early diverging grasses will be useful for resolving this open question, but will require  
806 pseudomolecule-quality assemblies. Two other species of *Streptochaeta* have been  
807 reported to have  $n=11$  chromosomes (Valencia, 1962; Pohl and Davidse, 1971;  
808 Hunziker et al., 1982), well below the number reported for the sister species  
809 *Anomochloa marantoidea*,  $n=18$  (Judziewicz and Soderstrom, 1989). The outgroups  
810 *Joinvillea plicata* and *Ecdeiocolea monostachya* have  $n=18$  (Newell, 1969) and  $n=19$   
811 (Hanson et al., 2005), respectively. However, without high quality genomes and good  
812 cytogenetic data for these species, the ancestral chromosome number and structure of  
813 the genomes of ancestral grasses remains a matter of speculation.

814 Finally, these are but a few of the opportunities for understanding trait evolution in the  
815 grasses based on investigation of *Streptochaeta*, with additional insights possible in, for  
816 example, the study of embryo development, caryopsis modifications, endosperm/starch  
817 evolution and branching/tillering. We have demonstrated that genomes of targeted, non-  
818 model species, particularly those that are sister to large, better-studied groups, can  
819 provide out-sized insight about the nature of evolutionary transitions and should be an  
820 increased focus now that genome assembly is a broadly accessible component of the  
821 biologist's toolkit.

## 822 **Data Availability**

823 The sRNA-seq data were reported in a previous study (Patel et al., 2021). Also, one  
824 library of RNA-Seq (SRR3233339) used for annotation was previously published  
825 (Givnish et al., 2010). Otherwise, all data utilized in this study are original. The complete  
826 set of raw WGS, RNA-seq, sRNA-seq and PARE-seq reads were deposited in the  
827 Sequence Read Archive under the BioProject ID PRJNA343128. Alignments and  
828 phylogenies for AP2-like and MYB R2R3 genes have been deposited at datadryad.org,  
829 accession #XXX (to be added after acceptance). The scripts and commands used for  
830 generating assembly, annotations, small RNA analyses and phylogenetic analyses are  
831 documented in the GitHub repository accessible here:  
832 <https://github.com/HuffordLab/streptochaeta>

## 833 **Acknowledgments**

834 We thank Sandra Mathioni for construction of the RNA-seq and PARE libraries. Y.Y.  
835 was supported by NSF grant IOS-1938086 to E.A.K. and by an Enterprise-Rent-a-Car  
836 Foundation award through the Donald Danforth Plant Science Center, also to E.A.K.  
837 S.B. was supported by USDA | National Institute of Food and Agriculture “BTT EAGER”  
838 award no. 2018–09058 to B.C.M., as well as resources from the Donald Danforth Plant  
839 Science Center and the University of Missouri–Columbia. A.S. was supported by NSF  
840 grant IOS-1822330 to M.B.H. This work used 1) Extreme Science and Engineering  
841 Discovery Environment (XSEDE)(National Science Foundation Grant No. ACI-1548562)  
842 via Blacklight HPC environment allocation TG-MCB140103 and 2) HPC equipment at  
843 Iowa State University, some of which has been purchased through funding provided by  
844 NSF under MRI grant number 1726447. We thank Dr. Philip Blood for his assistance  
845 with MaSuRCA optimization, which was made possible through the XSEDE Extended  
846 Collaborative Support Service (ECSS) program.

## 847 **Author contributions statement**

848 M.B.H., A.S., E.A.K, and L.G.C. designed the project. L.G.C. and E.A.K. provided plant  
849 material. M.B.H. and A.S. generated sequence data and assembled the genome. S.B.  
850 and B.C.M. analyzed data on small RNAs. Y.Y. analyzed AP2 and MYB sequence data.  
851 All authors drafted and edited the manuscript, and produced figures and tables.

## 852 **Conflict of Interest**

853 The authors declare that the research was conducted in the absence of any commercial  
854 or financial relationships that could be construed as a potential conflict of interest.

855

856 **Figures**

**A**

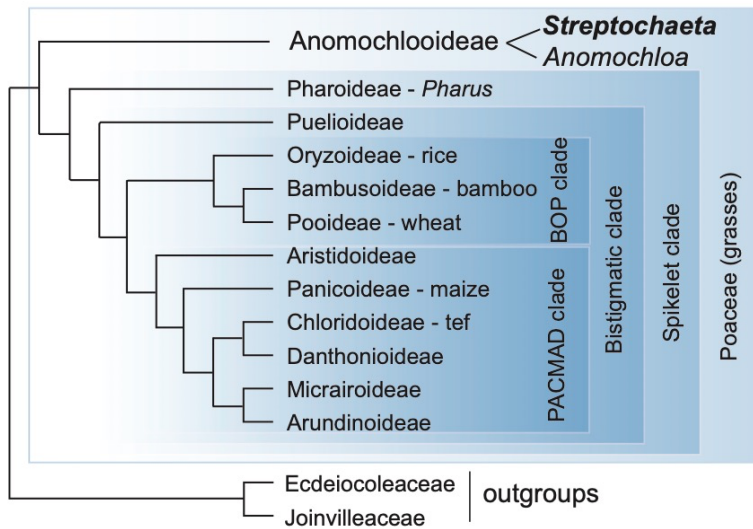

**B**

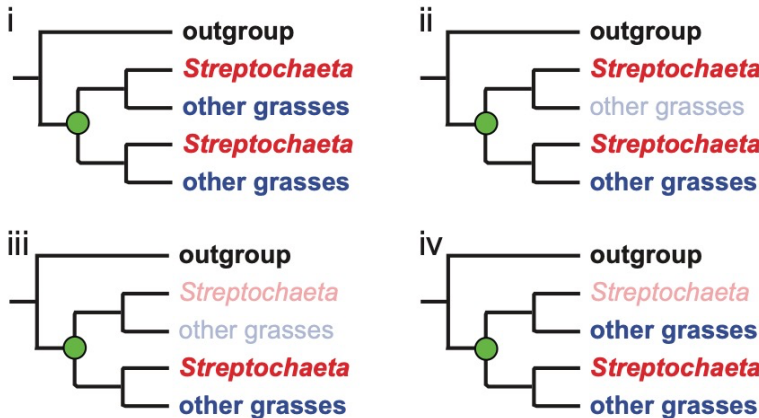

**C**

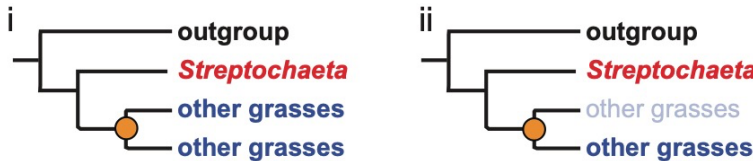

857

858 **Figure 1. The phylogenetic placement of *Streptochoeta*.** (A) Phylogenetic tree depicting the BOP  
 859 (Bambusoideae, Oryzoideae, Pooideae) + PACMAD (Panicoideae, Aristidoideae, Chloridoideae,  
 860 Micrairoideae, Arundinoideae, Danthonioideae) clade and the basal placement of focal organism  
 861 *Streptochoeta*. (B) and (C) Possible patterns of whole genome duplication (WGD) and gene loss. (B)  
 862 WGD before the divergence of *Streptochoeta* assuming (i) no gene loss; (ii) loss of one clade of non-  
 863 *Streptochoeta* grass paralogs soon after WGD; (iii) loss of all grass paralogs soon after WGD; (iv) loss of  
 864 one *Streptochoeta* paralog soon after WGD. (C) WGD after divergence of *Streptochoeta*. (i) no gene loss;  
 865 (ii) loss of one clade of non-*Streptochoeta* grass paralogs soon after WGD. Note that patterns (Biii) and  
 866 (Cii) are indistinguishable.

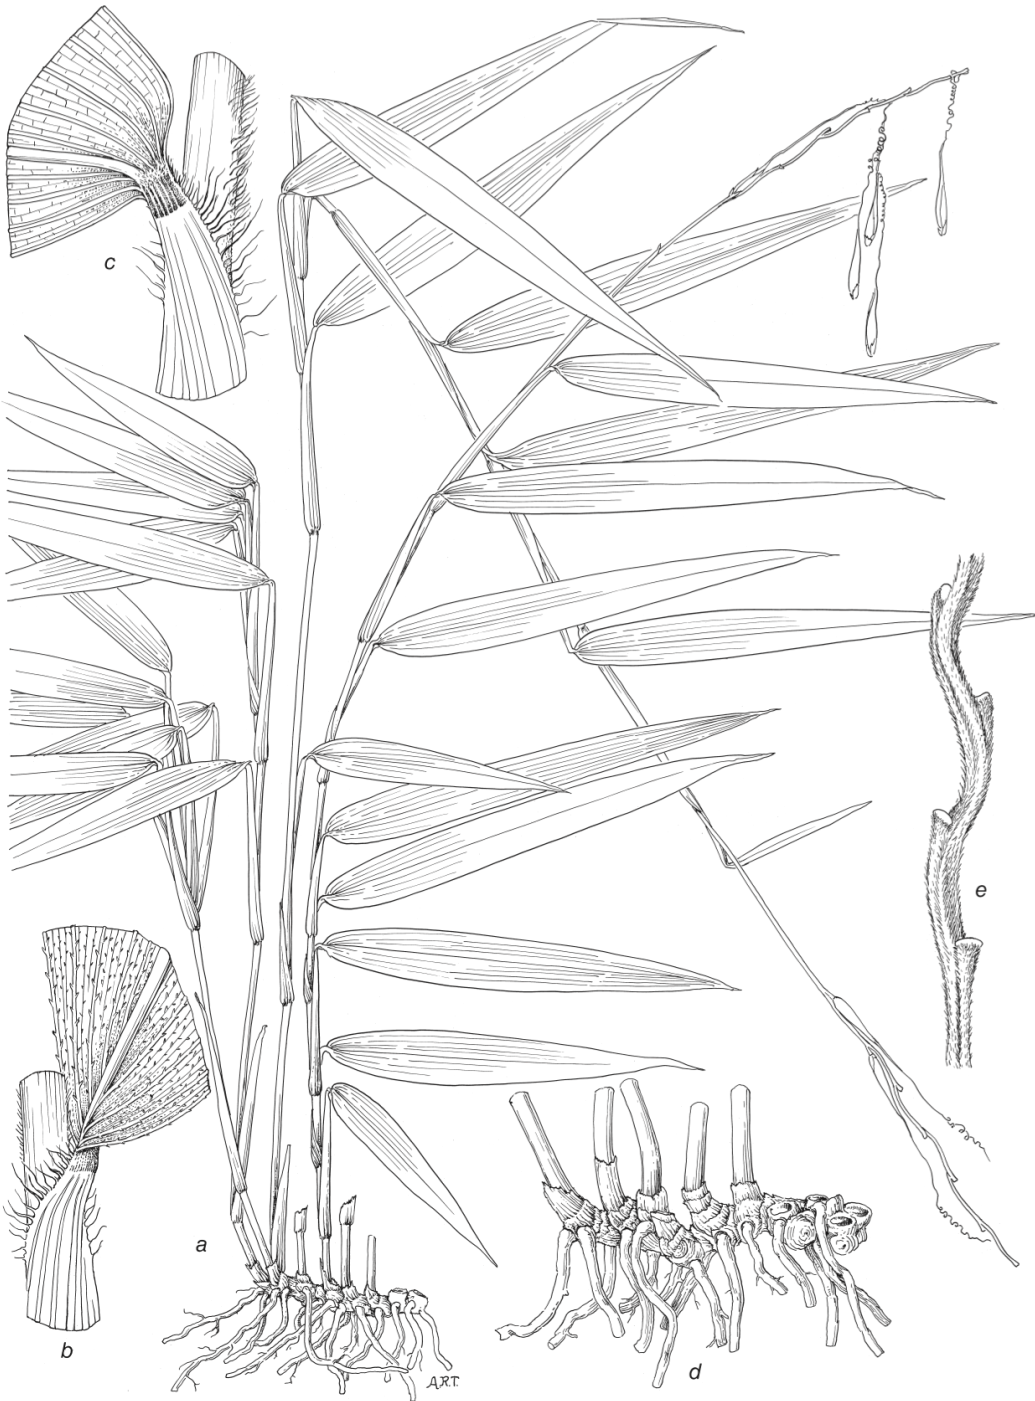

867

868 **Figure 2. *Streptochaeta angustifolia*.** (A) Habit ( $\times 0.5$ ). (B) Mid-region of leaf showing summit of sheath  
869 and upper surface of blade ( $\times 4.5$ ). (C) Mid-region of leaf showing summit of sheath and lower surface of  
870 blade ( $\times 5$ ). (D) Rhizome system with culm base ( $\times 1$ ). (E) Portion of rachis enlarged ( $\times 1.5$ ) All drawings  
871 based on Soderstrom & Sucre 1969 (US). Illustration by Alice R. Tangerini. Reprinted from Soderstrom  
872 (1981, Some evolutionary trends in the Bambusoideae (Poaceae), *Annals of the Missouri Botanical*  
873 *Garden* 68: 15-47, originally Figure 5, p. 31), with permission from the Missouri Botanical Garden Press.

874

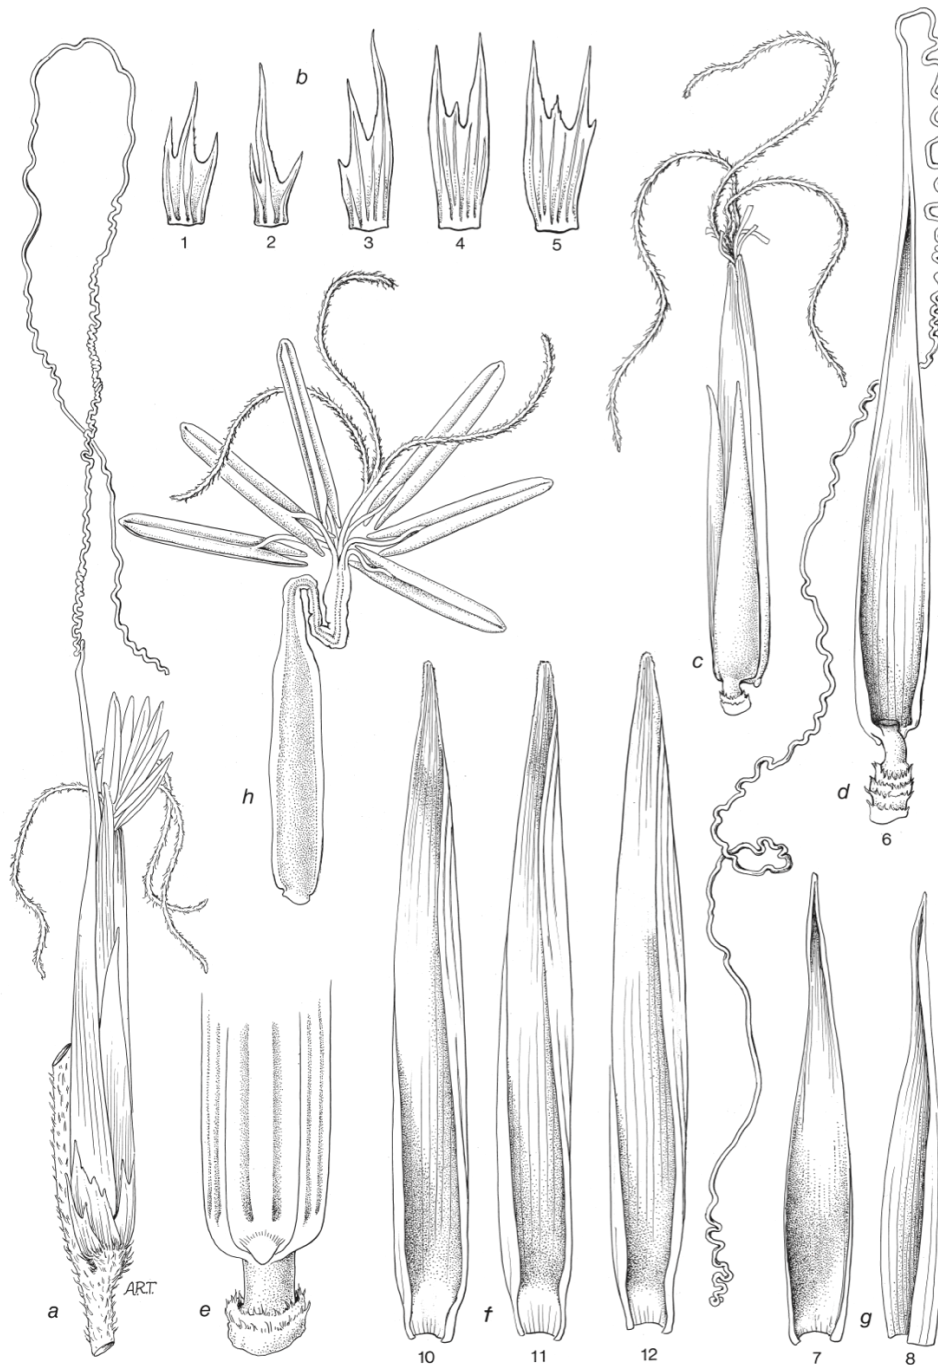

875

876 **Figure 3. *Streptochaeta angustifolia*.** (A) Pseudospikelet ( $\times 4.5$ ). (B) Series of bracts 1-5 from the base  
877 of the pseudospikelet ( $\times 6$ ). (C) Pseudospikelet with basal bracts 1-5 removed and showing bracts 7 and  
878 8, whose bases are overlapping ( $\times 4.5$ ). (D) Bract 6 with long coiled awn ( $\times 4.5$ ). (E) Back portion of the  
879 base of bract 6 showing region where embryo exits at germination. (F) Bracts 10-12 ( $\times 6$ ). (G) Bracts 7  
880 and 8 ( $\times 6$ ). Bract 9, which exists in other species, has not been found here. (H) Ovary with long style and  
881 three stigmas, surrounded by the thin, fused filaments of the 6 stamens ( $\times 4.5$ ). All drawings based on  
882 Soderstrom & Sucre 1969 (US). Illustration by Alice R. Tangerini. Reprinted from Soderstrom (1981,  
883 Some evolutionary trends in the Bambusoideae (Poaceae), *Annals of the Missouri Botanical Garden* 68:  
884 15-47, originally Figure 6, p. 33), with permission from the Missouri Botanical Garden Press.



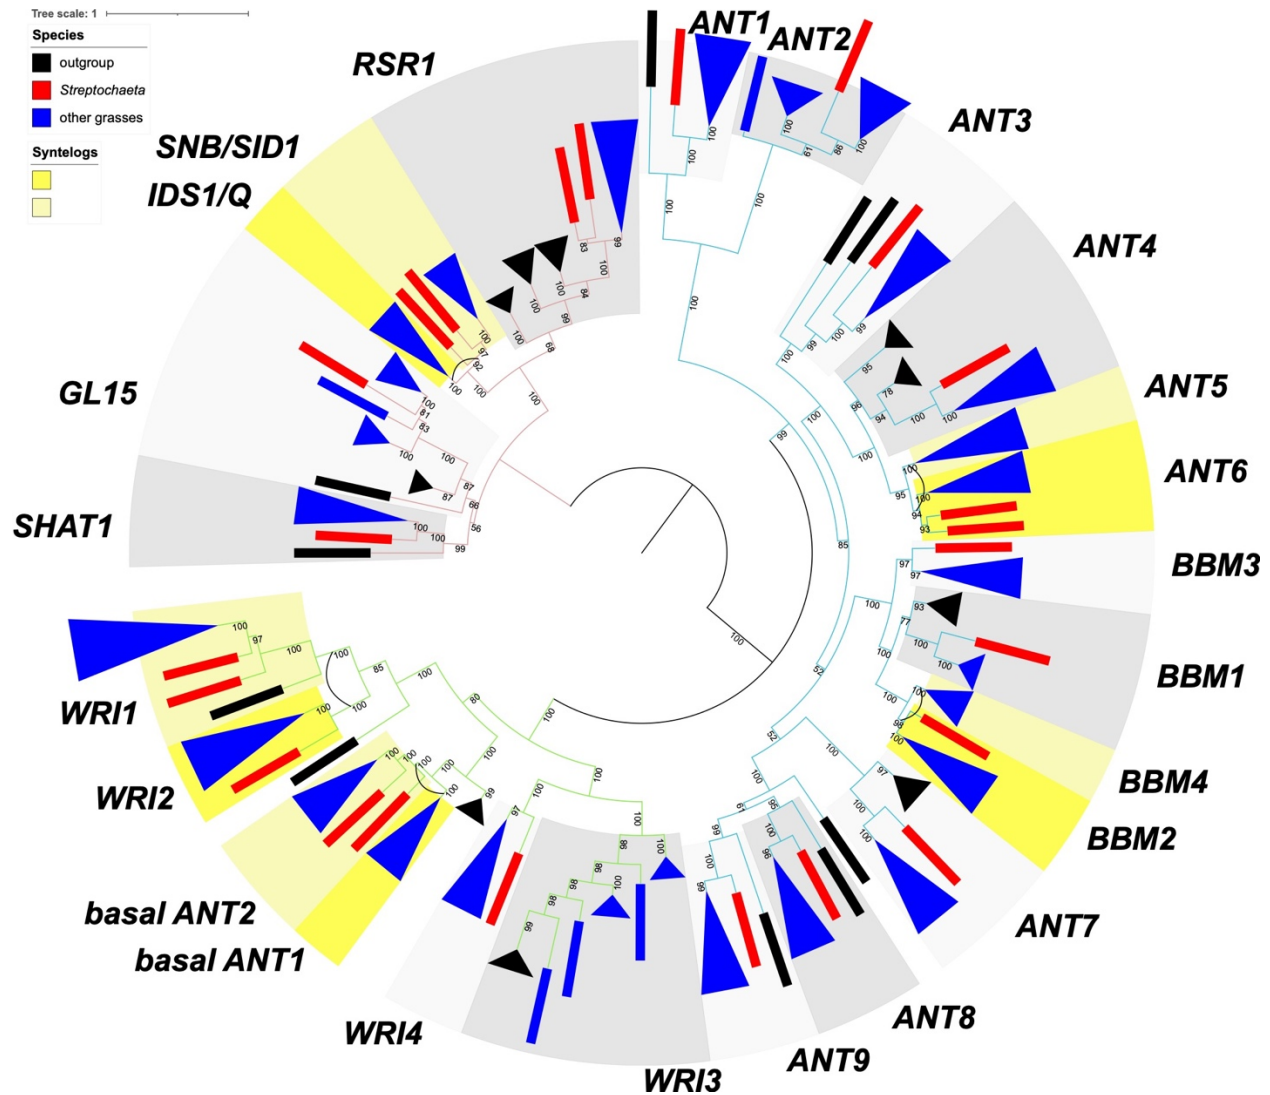

885

886 **Figure 4. Maximum likelihood tree of AP2-like genes.** Numbers on branches indicate maximum  
 887 likelihood bootstrap values. A single gene is denoted by a rectangle, and collapsed branches are denoted  
 888 by triangles. Each subclade is shaded in two grey colors and named either by known genes within the  
 889 subclade or subfamily name with a number. Subclades with syntenic genes in *Brachypodium*, *Oryza* or  
 890 *Setaria* are shaded in two colors of yellow, and syntenic pairs are connected by an arc. Outgroup,  
 891 *Streptochaeta* and other grasses are shown in black, red and blue colors.

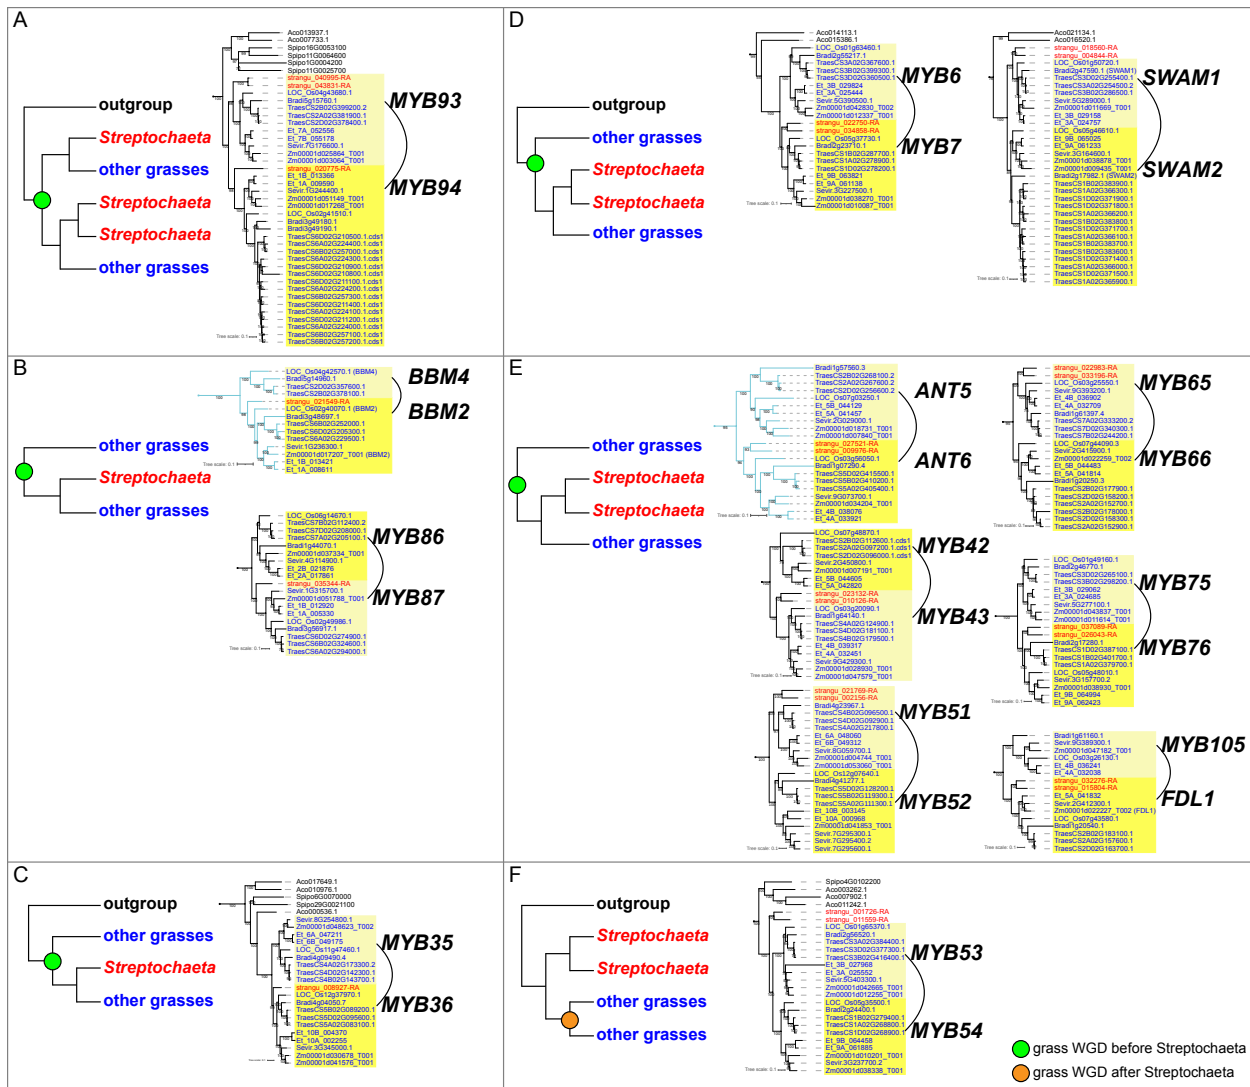

892

893 **Figure 5. Tree topologies of paired syntentic subclades that support grass whole genome**  
 894 **duplication (WGD) before or after the divergence of *Streptochoaeta*.** (A-E) Grass WGD before the  
 895 divergence of *Streptochoaeta*. Tree topologies: (A) (O,(S1,G1),((S2,S3),G2)). (B) (G1,(S2,G2)). (C)  
 896 (O,(G1,(S2,G2))). (D) (O,(G1,((S1,S2),G2))). (E) (G1,((S1,S2),G2)). (F) Grass WGD after the divergence  
 897 of *Streptochoaeta* with tree pattern of (O,(S1,S2),(G1,G2)).

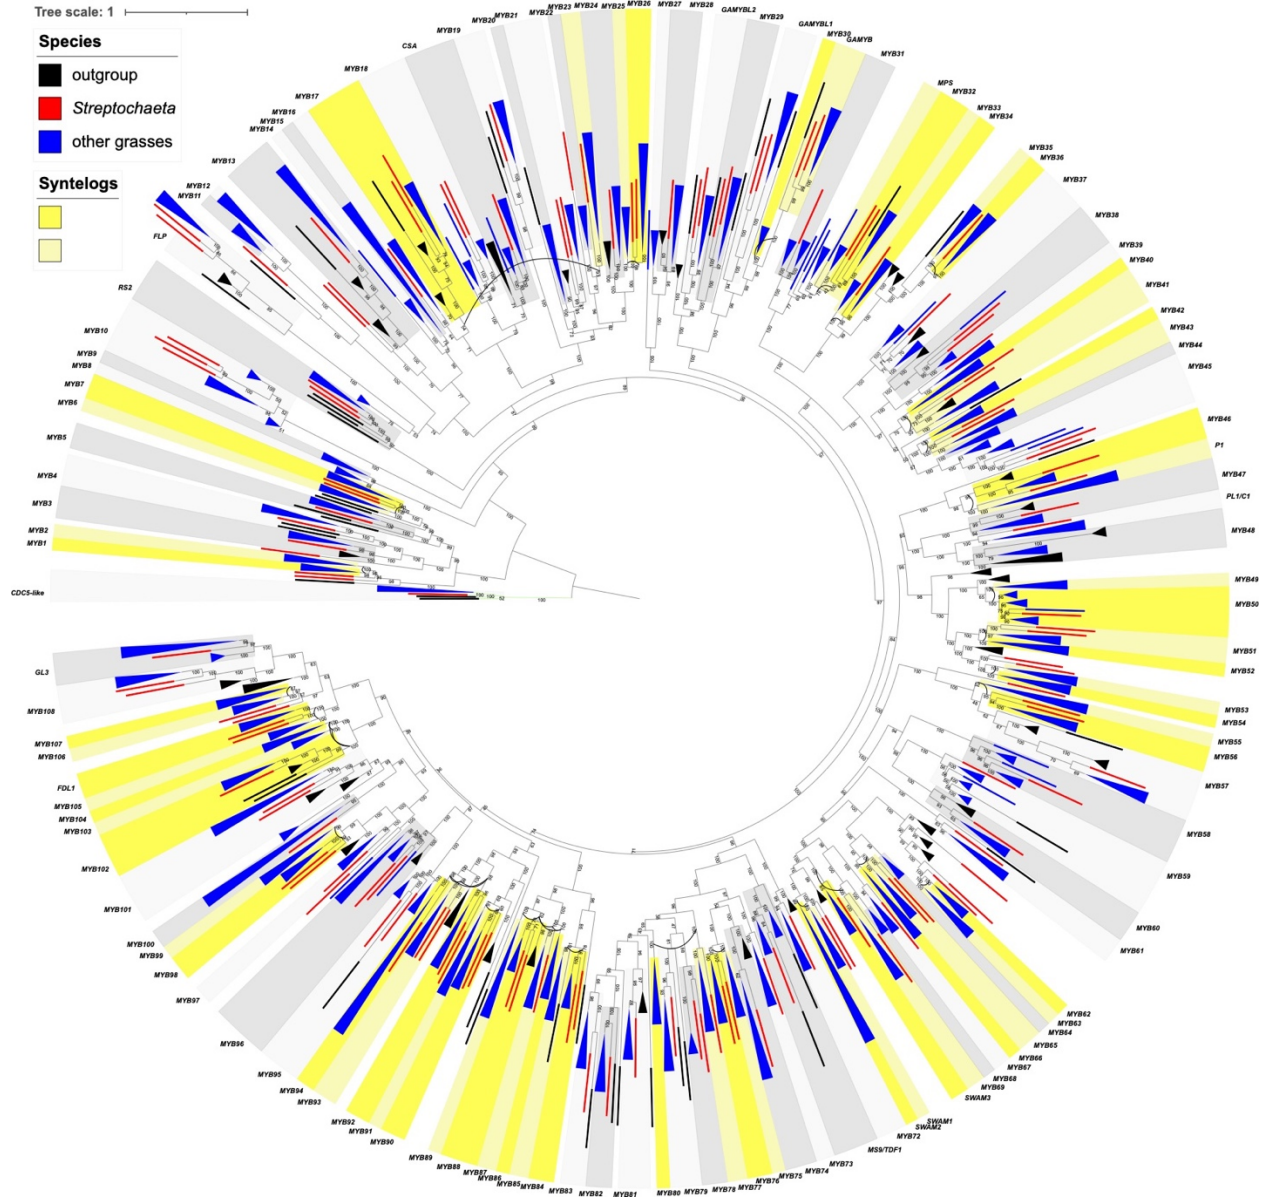

898

899 **Figure 6. Maximum likelihood tree of R2R3 genes.** Numbers on branches indicate maximum likelihood  
900 bootstrap values. A single gene is denoted by a rectangle, and collapsed branches are denoted in  
901 triangles. Each subclade is shaded in two grey colors and named either by known genes within the  
902 subclade or subfamily name with a number. Subclades with syntenic genes in *Brachypodium*, *Oryza* or  
903 *Setaria* are shaded in two colors of yellow, and syntenic pairs are connected by an arc. Outgroup,  
904 *Streptochaeta* and other grasses are shown in black, red and blue colors.

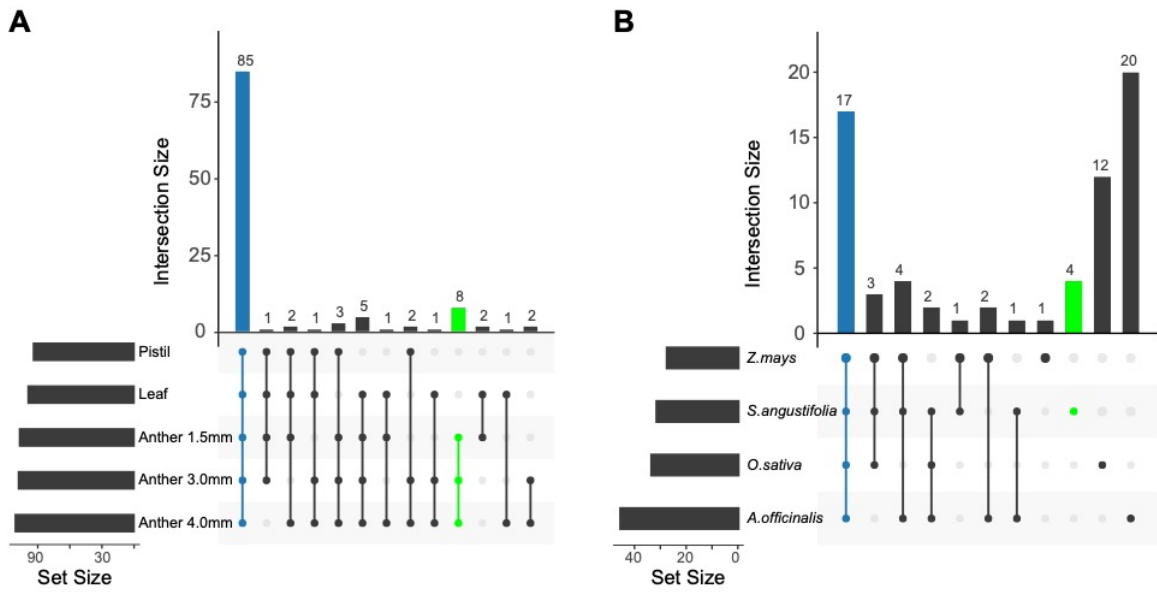

905

906

907

**Figure 7:** Overlap of miRNA loci annotated in *Streptochoeta* tissues **(A)** and miRNA families annotated in *Streptochoeta* anthers compared to three other monocots **(B)**.

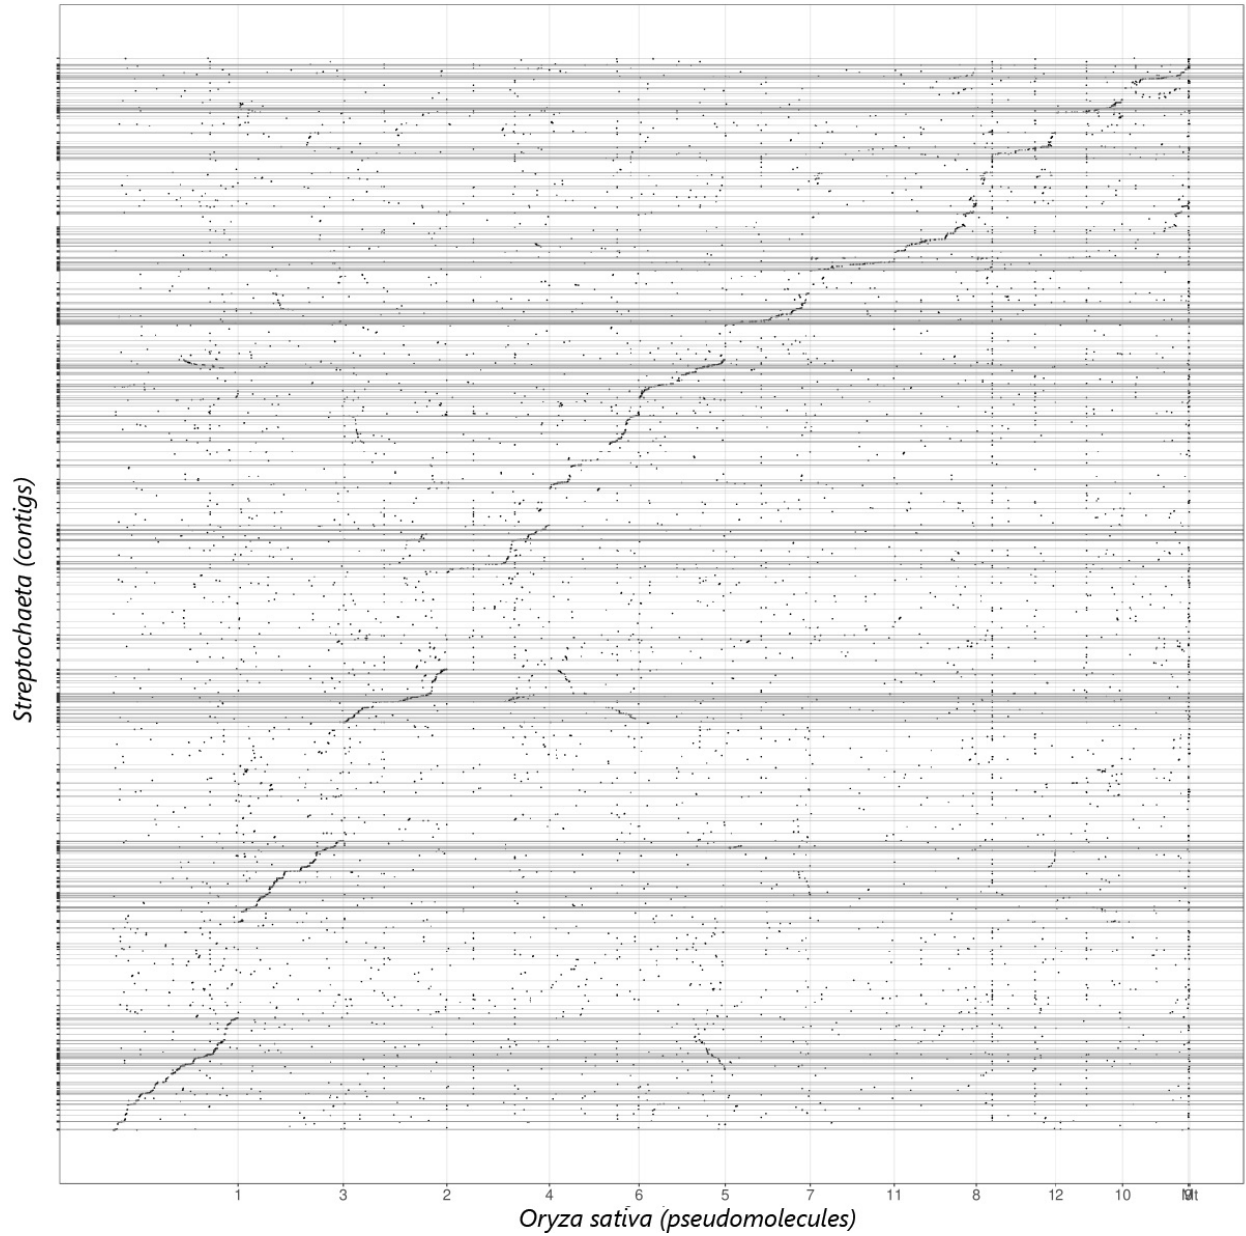

908

909

910

**Figure S1. Dot plot of *Streptochaeta* versus *Oryza sativa*.** The contigs of the draft *Streptochaeta* assembly plotted against *Oryza sativa* (Nipponbare; (Ouyang et al., 2007)) pseudomolecules.

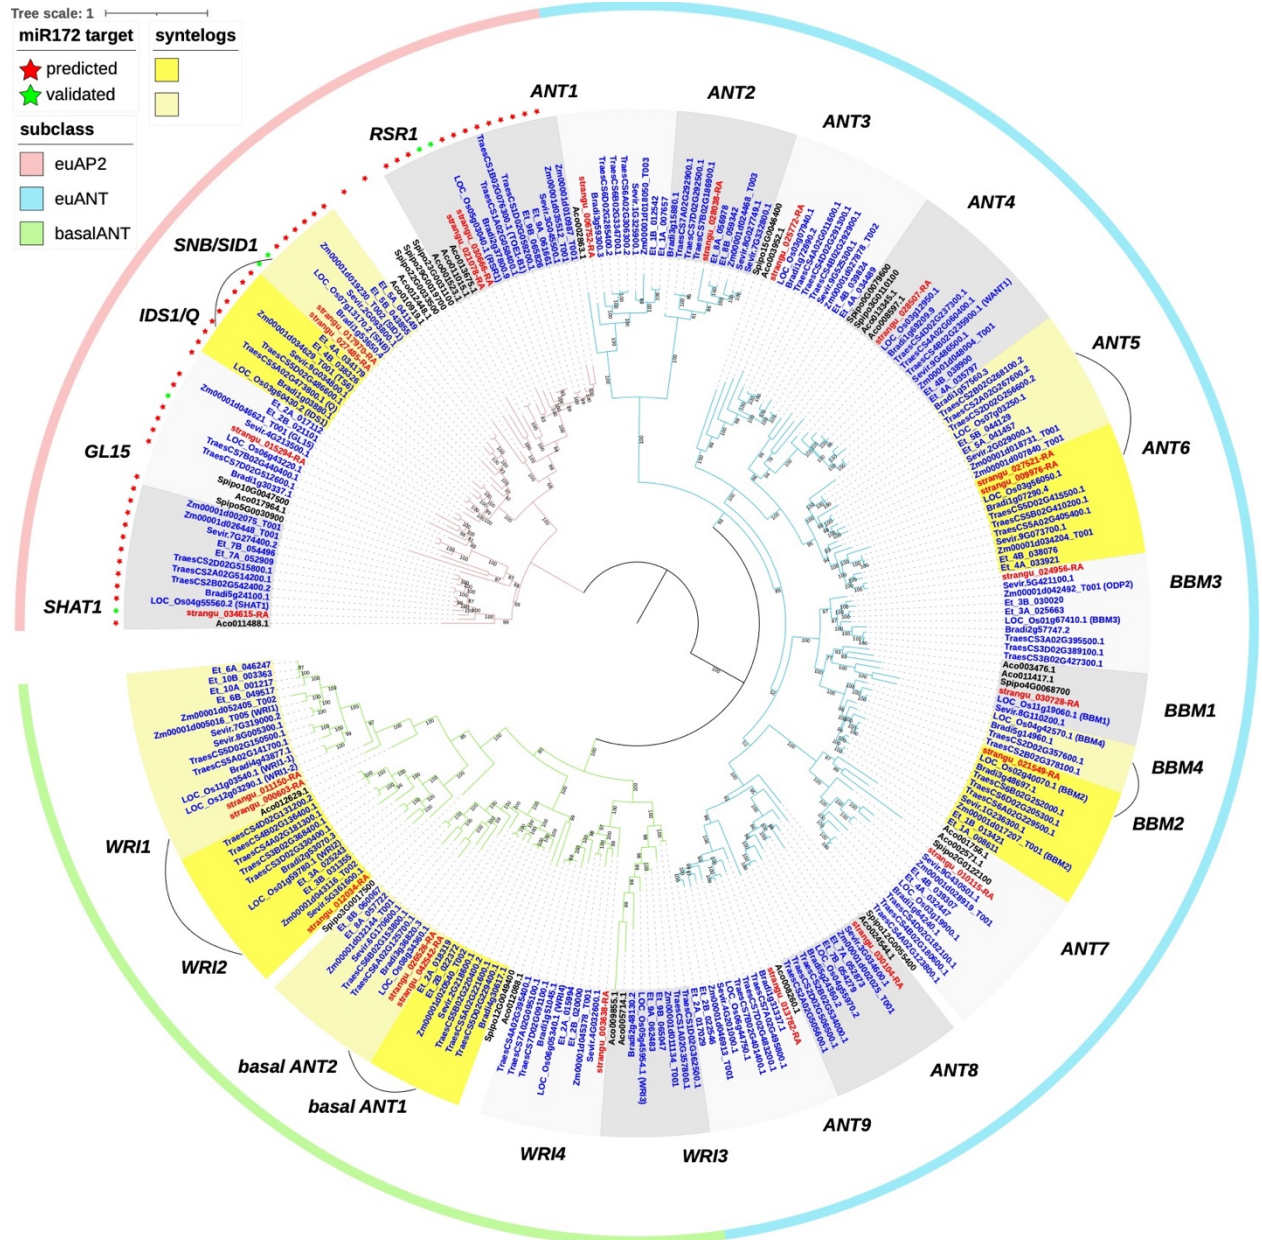

911

912 **Figure S2. Maximum likelihood tree of AP2-like genes with gene names.** Bootstrap values are shown  
 913 on the branches. Each subclade is shaded in two grey colors and named either by known genes within  
 914 the subclade or subfamily name with a number. Subclades with syntenic genes in *Brachypodium*, *Oryza*  
 915 or *Setaria* are shaded in two colors of yellow, and syntenic pairs are connected by an arc. Predicted and  
 916 experimentally validated miR172 binding sites are denoted by red and green stars, respectively.

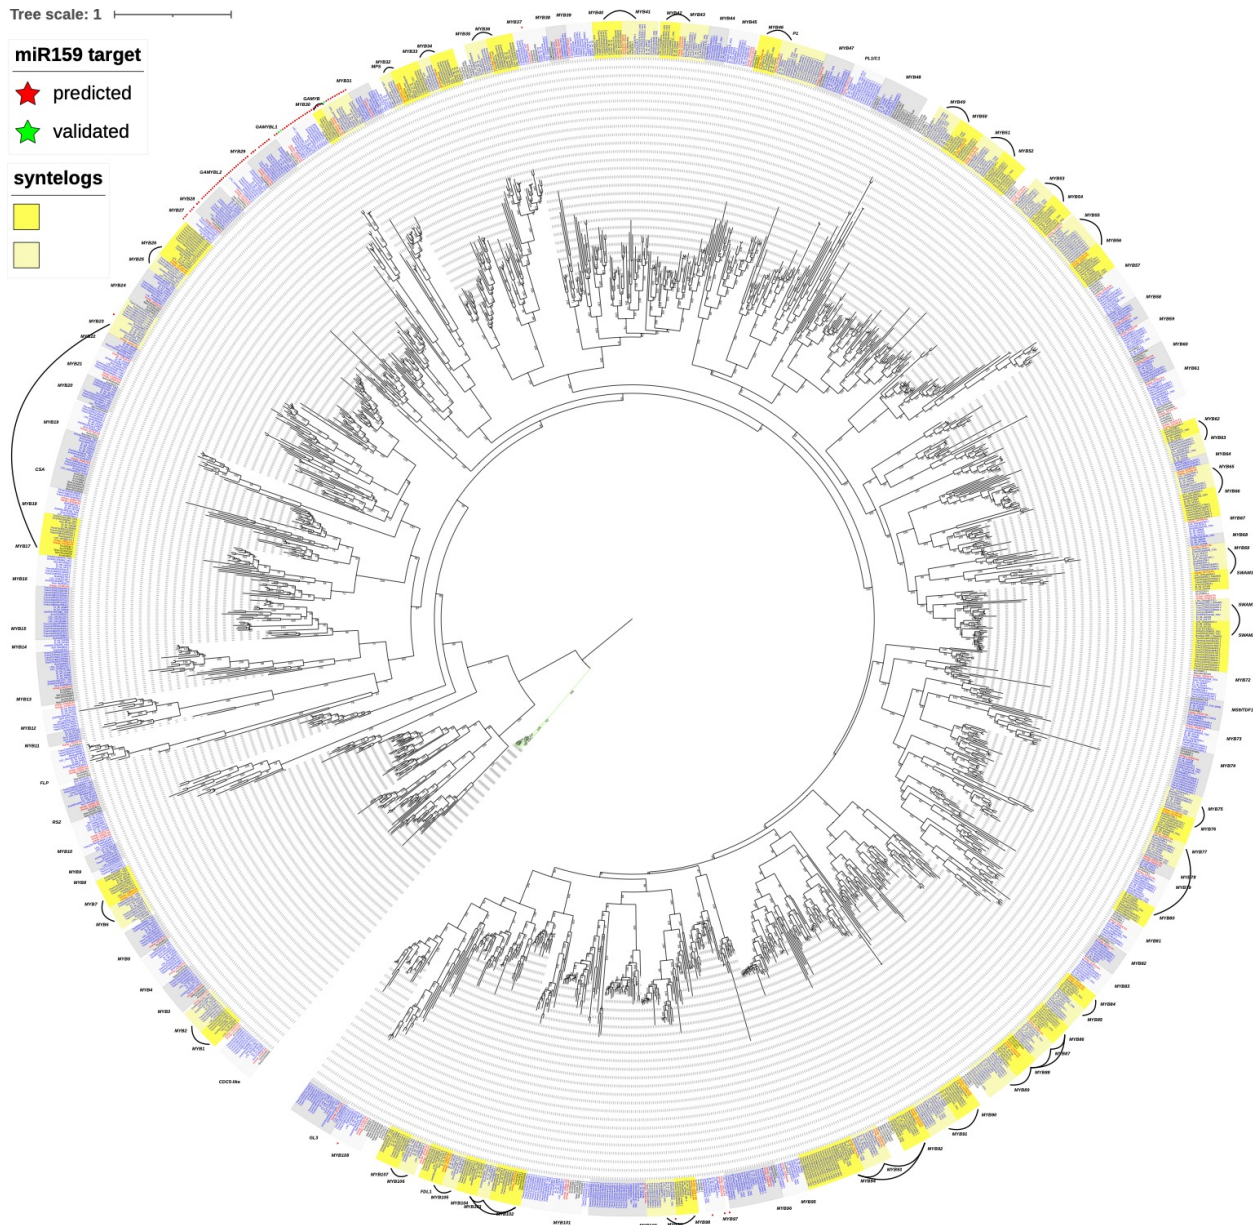

917

918 **Figure S3. Maximum likelihood tree of R2R3 genes with gene names.** Bootstrap values are shown on  
919 the branches. Each subclade is shaded in two grey colors and named either by known genes within the  
920 subclade or subfamily name with a number. Subclades with syntenic genes in *Brachypodium*, *Oryza* or  
921 *Setaria* are shaded in two colors of yellow, and syntenic pairs are connected by an arc. Predicted and  
922 experimental validated miR159 binding sites are denoted by red and green stars, respectively.

## 923 **Tables (see supplemental excel file)**

924 Supplemental Table 1: Short reads (raw data) used for the assembly and their  
925 estimated coverage based on a genome size of 1.8 Gbp

926 Supplemental Table 2: Criteria for merging ab initio gene models with the direct  
927 evidence models. The codes are as described in the Mikado compare manual. For the

- 928 comaprision, BRAKER gene models were used as prediction and evidence models  
929 were used as reference.
- 930 Supplemental Table 3: Source of genome, annotation version, and sRNA-seq data used  
931 in this study
- 932 Supplemental Table 4: 5' and 3' adapters used to construct RNA-seq libraries.
- 933 Supplemental Table 5: Summary statistics of the genome assembly after each iteration  
934 of Redundans.
- 935 Supplemental Table 6: Phylostrata distribution of the genes predicted by BIND strategy
- 936 Supplemental Table 7: Tree topologies of the subclades in the AP2-like and R2R3 MYB  
937 trees. O: outgroup; S: Streptochaeta; G: grasses other than Streptochaeta. If  
938 Streptochaeta and/or outgroup genes are inside of a grass clade, it is labeled as S-G or  
939 O-G.
- 940 Supplemental Table 8: Summary of miRNA and phasiRNA annotated in anthers of  
941 Streptocheata angustifolia and other monocots.
- 942 Supplemental Table 9: Coordinates and abundance of the 114 annotated miRNAs in  
943 Streptochaeta angustifolia.
- 944 Supplemental Table 10: Candidate novel miRNA annotated in Streptochaeta. This table  
945 details the sequence and abundance of each mature miRNA and miRNA-star plus the  
946 sequence of the locus and the predicted RNA secondary structure in dot-bracket  
947 notation.
- 948 Supplemental Table 11: Summary of miRNA targets validated via PARE-Seq. The  
949 described miRNAs were captured in Streptochaeta angustifolia anthers.
- 950 Supplemental Table 12: Details of PARE-validated miRNA cleavage sites detected in  
951 anther, pistil and leaf tissues in Streptochaeta.



## 952 **References**

- 953 Alonso-Peral, M. M., Li, J., Li, Y., Allen, R. S., Schnippenkoetter, W., Ohms, S., et al.  
954 (2010). The microRNA159-regulated GAMYB-like genes inhibit growth and promote  
955 programmed cell death in Arabidopsis. *Plant Physiol.* 154, 757–771.
- 956 Arendsee, Z., Li, J., Singh, U., Seetharam, A., Dorman, K., and Wurtele, E. S. (2019).  
957 phylostratr: a framework for phylostratigraphy. *Bioinformatics* 35, 3617–3627.
- 958 Arendsee, Z. W., Li, L., and Wurtele, E. S. (2014). Coming of age: orphan genes in  
959 plants. *Trends Plant Sci.* 19, 698–708.
- 960 Argout, X., Salse, J., Aury, J.-M., Guiltinan, M. J., Droc, G., Gouzy, J., et al. (2011). The  
961 genome of *Theobroma cacao*. *Nat. Genet.* 43, 101–108.
- 962 Artschwager, E., and McGuire, R. C. (1949). Cytology of reproduction in *Sorghum*  
963 *vulgare*. *J. Agric. Res.* 78, 659–673.
- 964 Aukerman, M. J., and Sakai, H. (2003). Regulation of flowering time and floral organ  
965 identity by a MicroRNA and its APETALA2-like target genes. *Plant Cell* 15, 2730–  
966 2741.
- 967 Axtell, M. J., and Meyers, B. C. (2018). Revisiting Criteria for Plant MicroRNA  
968 Annotation in the Era of Big Data. *Plant Cell* 30, 272–284.
- 969 Aya, K., Hiwatashi, Y., Kojima, M., Sakakibara, H., Ueguchi-Tanaka, M., Hasebe, M., et  
970 al. (2011). The Gibberellin perception system evolved to regulate a pre-existing  
971 GAMYB-mediated system during land plant evolution. *Nat. Commun.* 2, 544.
- 972 Aya, K., Ueguchi-Tanaka, M., Kondo, M., Hamada, K., Yano, K., Nishimura, M., et al.  
973 (2009). Gibberellin modulates anther development in rice via the transcriptional  
974 regulation of GAMYB. *Plant Cell* 21, 1453–1472.
- 975 Bartlett, M., Thompson, B., Brabazon, H., Del Gizzi, R., Zhang, T., and Whipple, C.  
976 (2016). Evolutionary Dynamics of Floral Homeotic Transcription Factor Protein-  
977 Protein Interactions. *Mol. Biol. Evol.* 33, 1486–1501.
- 978 Bélanger, S., Pokhrel, S., Czymmek, K., and Meyers, B. C. (2020). Premeiotic, 24-  
979 Nucleotide Reproductive PhasiRNAs Are Abundant in Anthers of Wheat and Barley  
980 but Not Rice and Maize. *Plant Physiol.* 184, 1407–1423.
- 981 Boetzer, M., Henkel, C. V., Jansen, H. J., Butler, D., and Pirovano, W. (2011).  
982 Scaffolding pre-assembled contigs using SSPACE. *Bioinformatics* 27, 578–579.
- 983 Bonnet, E., He, Y., Billiau, K., and Van de Peer, Y. (2010). TAPIR, a web server for the  
984 prediction of plant microRNA targets, including target mimics. *Bioinformatics* 26,  
985 1566–1568.

- 986 Boutilier, K., Offringa, R., Sharma, V. K., Kieft, H., Ouellet, T., Zhang, L., et al. (2002).  
987 Ectopic expression of BABY BOOM triggers a conversion from vegetative to  
988 embryonic growth. *Plant Cell* 14, 1737–1749.
- 989 Cai, C.-F., Zhu, J., Lou, Y., Guo, Z.-L., Xiong, S.-X., Wang, K., et al. (2015). The  
990 functional analysis of OsTDF1 reveals a conserved genetic pathway for tapetal  
991 development between rice and Arabidopsis. *Sci Bull. Fac. Agric. Kyushu Univ.* 60,  
992 1073–1082.
- 993 Camacho, C., Coulouris, G., Avagyan, V., Ma, N., Papadopoulos, J., and Bealer, K.  
994 (2009). BLAST plus: architecture and applications. *BMC Bioinformatics. BioMed*  
995 *Central* 10, 1.
- 996 Capella-Gutiérrez, S., Silla-Martínez, J. M., and Gabaldón, T. (2009). trimAl: a tool for  
997 automated alignment trimming in large-scale phylogenetic analyses. *Bioinformatics*  
998 25, 1972–1973.
- 999 Christensen, A. R., and Malcomber, S. T. (2012). Duplication and diversification of the  
1000 LEAFY HULL STERILE1 and *Oryza sativa* MADS5 SEPALLATA lineages in  
1001 graminoid Poales. *Evodevo* 3, 4.
- 1002 Chuck, G., Meeley, R. B., and Hake, S. (1998). The control of maize spikelet meristem  
1003 fate by the APETALA2-like gene indeterminate spikelet1. *Genes Dev.* 12, 1145–  
1004 1154.
- 1005 Chuck, G., Meeley, R., and Hake, S. (2008). Floral meristem initiation and meristem cell  
1006 fate are regulated by the maize AP2 genes *ids1* and *sid1*. *Development* 135, 3013–  
1007 3019.
- 1008 Chuck, G., Meeley, R., Irish, E., Sakai, H., and Hake, S. (2007). The maize tasselseed4  
1009 microRNA controls sex determination and meristem cell fate by targeting  
1010 Tasselseed6/indeterminate spikelet1. *Nat. Genet.* 39, 1517–1521.
- 1011 Clark, L. G., Zhang, W., and Wendel, J. F. (1995). A Phylogeny of the Grass Family  
1012 (Poaceae) Based on *ndhF* Sequence Data. *Syst. Bot.* 20, 436–460.
- 1013 Conklin, P. A., Johnston, R., Conlon, B. R., Shimizu, R., and Scanlon, M. J. (2020).  
1014 Plant homeodomain proteins provide a mechanism for how leaves grow wide.  
1015 *Development* 147.
- 1016 Conway, J. R., Lex, A., and Gehlenborg, N. (2017). UpSetR: an R package for the  
1017 visualization of intersecting sets and their properties. *Bioinformatics* 33, 2938–  
1018 2940.
- 1019 Debernardi, J. M., Greenwood, J. R., Jean Finnegan, E., Jernstedt, J., and Dubcovsky,  
1020 J. (2020). APETALA 2-like genes AP2L2 and Q specify lemma identity and axillary  
1021 floral meristem development in wheat. *Plant J.* 101, 171–187.

- 1022 Edgar, R. C. (2010). Search and clustering orders of magnitude faster than BLAST.  
1023 *Bioinformatics* 26, 2460–2461.
- 1024 Edwards, E. J., and Smith, S. A. (2010). Phylogenetic analyses reveal the shady history  
1025 of C4 grasses. *Proc. Natl. Acad. Sci. U. S. A.* 107, 2532–2537.
- 1026 Fahlgren, N., and Carrington, J. C. (2010). miRNA Target Prediction in Plants. *Methods*  
1027 *Mol. Biol.* 592, 51–57.
- 1028 Fan, Y., Yang, J., Mathioni, S. M., Yu, J., Shen, J., Yang, X., et al. (2016). PMS1T,  
1029 producing phased small-interfering RNAs, regulates photoperiod-sensitive male  
1030 sterility in rice. *Proc. Natl. Acad. Sci. U. S. A.* 113, 15144–15149.
- 1031 Fei, Q., Yang, L., Liang, W., Zhang, D., and Meyers, B. C. (2016). Dynamic changes of  
1032 small RNAs in rice spikelet development reveal specialized reproductive phasiRNA  
1033 pathways. *J. Exp. Bot.* 67, 6037–6049.
- 1034 Furness, C. A., and Rudall, P. J. (1998). The tapetum and systematics in  
1035 monocotyledons. *Bot. Rev.* 64, 201–239.
- 1036 Gallaher, T. J., Adams, D. C., Attigala, L., Burke, S. V., Craine, J. M., Duvall, M. R., et  
1037 al. (2019). Leaf shape and size track habitat transitions across forest-grassland  
1038 boundaries in the grass family (Poaceae). *Evolution* 73, 927–946.
- 1039 Gibson, D. J. (2009). *Grasses and Grassland Ecology*. Oxford, UK: Oxford University  
1040 Press.
- 1041 Givnish, T. J., Ames, M., McNeal, J. R., McKain, M. R., Roxanne Steele, P.,  
1042 dePamphilis, C. W., et al. (2010). Assembling the Tree of the Monocotyledons:  
1043 Plastome Sequence Phylogeny and Evolution of Poales1. *Ann. Mo. Bot. Gard* 97,  
1044 584–616.
- 1045 Grass Phylogeny Working Group, Barker, N. P., Clark, L. G., Davis, J. I., Duvall, M. R.,  
1046 Guala, G. F., et al. (2001). Phylogeny and Subfamilial Classification of the Grasses  
1047 (Poaceae). *Ann. Mo. Bot. Gard.* 88, 373–457.
- 1048 Grass Phylogeny Working Group II (2012). New grass phylogeny resolves deep  
1049 evolutionary relationships and discovers C4 origins. *New Phytol.* 193, 304–312.
- 1050 Hanson, L., Boyd, A., Johnson, M. A. T., and Bennett, M. D. (2005). First nuclear DNA  
1051 C-values for 18 eudicot families. *Ann. Bot.* 96, 1315–1320.
- 1052 Haug-Baltzell, A., Stephens, S. A., Davey, S., Scheidegger, C. E., and Lyons, E. (2017).  
1053 SynMap2 and SynMap3D: web-based whole-genome synteny browsers.  
1054 *Bioinformatics* 33, 2197–2198.
- 1055 Hirano, H.-Y., Tanaka, W., and Toriba, T. (2014). “Grass Flower Development,” in  
1056 *Flower Development: Methods and Protocols*, eds. J. L. Riechmann and F. Wellmer

- 1057 (New York, NY: Springer New York), 57–84.
- 1058 Hoff, K. J., Lomsadze, A., Borodovsky, M., and Stanke, M. (2019). “Whole-Genome  
1059 Annotation with BRAKER,” in *Gene Prediction: Methods and Protocols*, ed. M.  
1060 Kollmar (New York, NY: Springer New York), 65–95.
- 1061 Howe, K. L., Achuthan, P., Allen, J., Allen, J., Alvarez-Jarreta, J., Amode, M. R., et al.  
1062 (2021). Ensembl 2021. *Nucleic Acids Res.* 49, D884–D891.
- 1063 Huang, Y., Zhao, S., Fu, Y., Sun, H., Ma, X., Tan, L., et al. (2018). Variation in the  
1064 regulatory region of FZP causes increases in secondary inflorescence branching  
1065 and grain yield in rice domestication. *Plant J.* 96, 716–733.
- 1066 Hunziker, J. H., Wulff, A. F., and Soderstrom, T. R. (1982). Chromosome Studies on the  
1067 Bambusoideae (Gramineae). *Brittonia* 34, 30.
- 1068 International Brachypodium Initiative (2010). Genome sequencing and analysis of the  
1069 model grass *Brachypodium distachyon*. *Nature* 463, 763–768.
- 1070 Jiang, C.-K., and Rao, G.-Y. (2020). Insights into the Diversification and Evolution of  
1071 R2R3-MYB Transcription Factors in Plants. *Plant Physiol.* 183, 637–655.
- 1072 Johnson, C., Kasprzewska, A., Tennessen, K., Fernandes, J., Nan, G.-L., Walbot, V., et  
1073 al. (2009). Clusters and superclusters of phased small RNAs in the developing  
1074 inflorescence of rice. *Genome Res.* 19, 1429–1440.
- 1075 Johnson, N. R., Yeoh, J. M., Coruh, C., and Axtell, M. J. (2016). Improved Placement of  
1076 Multi-mapping Small RNAs. *G3* 6, 2103–2111.
- 1077 Judziewicz, E. J., Clark, L. G., Londoño, X., and Stern M. J. (1999). *American*  
1078 *Bamboos*. Washington, D.C.: Smithsonian Books.
- 1079 Judziewicz, E. J., and Soderstrom, T. R. (1989). Morphological, anatomical, and  
1080 taxonomic studies in *Anomochloa* and *Streptochaeta* (Poaceae: Bambusoideae).  
1081 *Smithson. Contrib. Bot.* Available at:  
1082 <https://repository.si.edu/bitstream/handle/10088/6984/scb-0068.pdf>.
- 1083 Kaneko, M., Inukai, Y., Ueguchi-Tanaka, M., Itoh, H., Izawa, T., Kobayashi, Y., et al.  
1084 (2004). Loss-of-function mutations of the rice GAMYB gene impair alpha-amylase  
1085 expression in aleurone and flower development. *Plant Cell* 16, 33–44.
- 1086 Katoh, K., and Standley, D. M. (2013). MAFFT multiple sequence alignment software  
1087 version 7: improvements in performance and usability. *Mol. Biol. Evol.* 30, 772–780.
- 1088 Kellogg, E. A. (2015). “Poaceae,” in *The Families and Genera of Vascular Plants*, ed. K.  
1089 Kubitzki (Springer), 1–416.
- 1090 Kellogg, E. A., Camara, P. E. A. S., Rudall, P. J., Ladd, P., Malcomber, S. T., Whipple,

- 1091 C. J., et al. (2013). Early inflorescence development in the grasses (Poaceae).  
1092 *Front. Plant Sci.* 4, 250.
- 1093 Kielbasa, S. M., Wan, R., Sato, K., Horton, P., and Frith, M. C. (2011). Adaptive seeds  
1094 tame genomic sequence comparison. *Genome Research* 21, 487–493.
- 1095 Kim, S., Soltis, P. S., Wall, K., and Soltis, D. E. (2006). Phylogeny and domain evolution  
1096 in the APETALA2-like gene family. *Mol. Biol. Evol.* 23, 107–120.
- 1097 Kirpes, C. C., Clark, L. G., and Lersten, N. R. (1996). Systematic significance of pollen  
1098 arrangement in microsporangia of Poaceae and Cyperaceae: review and  
1099 observations on representative taxa. *Am. J. Bot.* 83, 1609–1622.
- 1100 Kozomara, A., Birgaoanu, M., and Griffiths-Jones, S. (2019). miRBase: from microRNA  
1101 sequences to function. *Nucleic Acids Res.* 47, D155–D162.
- 1102 Kozomara, A., and Griffiths-Jones, S. (2014). miRBase: annotating high confidence  
1103 microRNAs using deep sequencing data. *Nucleic Acids Research* 42, D68–D73.
- 1104 Laetsch, D. R., and Blaxter, M. L. (2017). BlobTools: Interrogation of genome  
1105 assemblies. *F1000Res.* 6, 1287.
- 1106 Lauter, N., Kampani, A., Carlson, S., Goebel, M., and Moose, S. P. (2005).  
1107 microRNA172 down-regulates glossy15 to promote vegetative phase change in  
1108 maize. *Proc. Natl. Acad. Sci. U. S. A.* 102, 9412–9417.
- 1109 Leandro, T. D., Rodrigues, T. M., Clark, L. G., and Scatena, V. L. (2018). Fusoid cells in  
1110 the grass family Poaceae (Poales): a developmental study reveals homologies and  
1111 suggests new insights into their functional role in young leaves. *Ann. Bot.* 122,  
1112 833–848.
- 1113 Lee, D.-Y., and An, G. (2012). Two AP2 family genes, supernumerary bract (SNB) and  
1114 Osindeterminate spikelet 1 (OsIDS1), synergistically control inflorescence  
1115 architecture and floral meristem establishment in rice. *Plant J.* 69, 445–461.
- 1116 Lehmann, C. E. R., Griffith, D. M., Simpson, K. J., Michael Anderson, T., Archibald, S.,  
1117 Beerling, D. J., et al. (2019). Functional diversification enabled grassy biomes to fill  
1118 global climate space. *bioRxiv*. doi:10.1101/583625.
- 1119 Letunic, I., and Bork, P. (2019). Interactive Tree Of Life (iTOL) v4: recent updates and  
1120 new developments. *Nucleic Acids Res.* 47, W256–W259.
- 1121 Lex, A., Gehlenborg, N., Strobelt, H., Vuillemot, R., and Pfister, H. (2014). UpSet:  
1122 Visualization of Intersecting Sets. *IEEE Trans. Vis. Comput. Graph.* 20, 1983–1992.
- 1123 Li, C., Lin, H., Chen, A., Lau, M., Jernstedt, J., and Dubcovsky, J. (2019a). Wheat  
1124 VRN1, FUL2 and FUL3 play critical and redundant roles in spikelet development  
1125 and spike determinacy. *Development* 146.

- 1126 Li, H. (2018). Minimap2: pairwise alignment for nucleotide sequences. *Bioinformatics*  
1127 34, 3094–3100.
- 1128 Linder, H. P., Lehmann, C. E. R., Archibald, S., Osborne, C. P., and Richardson, D. M.  
1129 (2018). Global grass (Poaceae) success underpinned by traits facilitating  
1130 colonization, persistence and habitat transformation. *Biol. Rev. Camb. Philos. Soc.*  
1131 93, 1125–1144.
- 1132 Liu, K., Cao, J., Yu, K., Liu, X., Gao, Y., Chen, Q., et al. (2019). Wheat TaSPL8  
1133 Modulates Leaf Angle Through Auxin and Brassinosteroid Signaling1. *Plant*  
1134 *Physiol.* 181, 179–194.
- 1135 Li, Y., Zhu, J., Wu, L., Shao, Y., Wu, Y., and Mao, C. (2019b). Functional Divergence of  
1136 PIN1 Paralogous Genes in Rice. *Plant Cell Physiol.* 60, 2720–2732.
- 1137 Lorenz, R., Bernhart, S. H., Höner Zu Siederdisen, C., Tafer, H., Flamm, C., Stadler, P.  
1138 F., et al. (2011). ViennaRNA Package 2.0. *Algorithms Mol. Biol.* 6, 26.
- 1139 Lowe, K., Wu, E., Wang, N., Hoerster, G., Hastings, C., Cho, M.-J., et al. (2016).  
1140 Morphogenic Regulators Baby boom and Wuschel Improve Monocot  
1141 Transformation. *Plant Cell* 28, 1998–2015.
- 1142 Luo, R., Liu, B., Xie, Y., Li, Z., Huang, W., Yuan, J., et al. (2012). SOAPdenovo2: an  
1143 empirically improved memory-efficient short-read de novo assembler. *Gigascience*  
1144 1, 18.
- 1145 Lyons, E., and Freeling, M. (2008). How to usefully compare homologous plant genes  
1146 and chromosomes as DNA sequences. *Plant J.* 53, 661–673.
- 1147 Mamidi, S., Healey, A., Huang, P., Grimwood, J., Jenkins, J., Barry, K., et al. (2020). A  
1148 genome resource for green millet *Setaria viridis* enables discovery of agronomically  
1149 valuable loci. *Nat. Biotechnol.* 38, 1203–1210.
- 1150 Mantilla-Perez, M. B., Bao, Y., Tang, L., Schnable, P. S., and Salas-Fernandez, M. G.  
1151 (2020). Toward “Smart Canopy” Sorghum: Discovery of the Genetic Control of Leaf  
1152 Angle Across Layers. *Plant Physiol.* 184, 1927–1940.
- 1153 Marçais, G., and Kingsford, C. (2011). A fast, lock-free approach for efficient parallel  
1154 counting of occurrences of k-mers. *Bioinformatics* 27, 764–770.
- 1155 Martin, M. (2011). Cutadapt removes adapter sequences from high-throughput  
1156 sequencing reads. *EMBnet.journal* 17, 10–12.
- 1157 McKain, M. R., Tang, H., McNeal, J. R., Ayyampalayam, S., Davis, J. I., dePamphilis, C.  
1158 W., et al. (2016). A Phylogenomic Assessment of Ancient Polyploidy and Genome  
1159 Evolution across the Poales. *Genome Biol. Evol.* 8, 1150–1164.
- 1160 Minh, B. Q., Schmidt, H. A., Chernomor, O., Schrempf, D., Woodhams, M. D., von

- 1161 Haeseler, A., et al. (2020). IQ-TREE 2: New Models and Efficient Methods for  
1162 Phylogenetic Inference in the Genomic Era. *Mol. Biol. Evol.* 37, 1530–1534.
- 1163 Murat, F., Xu, J.-H., Tannier, E., Abrouk, M., Guilhot, N., Pont, C., et al. (2010).  
1164 Ancestral grass karyotype reconstruction unravels new mechanisms of genome  
1165 shuffling as a source of plant evolution. *Genome Res.* 20, 1545–1557.
- 1166 Newell, T. K. (1969). A study of the genus *Joinvillea* (Flagellariaceae). *J. Arnold Arbor.*  
1167 50, 527–555.
- 1168 Ou, S., Chen, J., and Jiang, N. (2018). Assessing genome assembly quality using the  
1169 LTR Assembly Index (LAI). *Nucleic Acids Res.* 46, e126.
- 1170 Ou, S., and Jiang, N. (2018). LTR\_retriever: A Highly Accurate and Sensitive Program  
1171 for Identification of Long Terminal Repeat Retrotransposons. *Plant Physiology* 176,  
1172 1410–1422.
- 1173 Ou, S., Su, W., Liao, Y., Chougule, K., Agda, J. R. A., Hellinga, A. J., et al. (2019).  
1174 Benchmarking transposable element annotation methods for creation of a  
1175 streamlined, comprehensive pipeline. *Genome Biol.* 20, 275.
- 1176 Ouyang, S., Zhu, W., Hamilton, J., Lin, H., Campbell, M., Childs, K., et al. (2007). The  
1177 TIGR Rice Genome Annotation Resource: improvements and new features.  
1178 *Nucleic Acids Res.* 35, D883–7.
- 1179 Patel, P., Mathioni, S. M., Hammond, R., Harkess, A. E., Kakrana, A., Arikrit, S., et al.  
1180 (2021). Reproductive phasiRNA loci and DICER-LIKE5, but not microRNA loci,  
1181 diversified in monocotyledonous plants. *Plant Physiol.* 185, 1764–1782.
- 1182 Paterson, A. H., Bowers, J. E., and Chapman, B. A. (2004). Ancient polyploidization  
1183 predating divergence of the cereals, and its consequences for comparative  
1184 genomics. *Proc. Natl. Acad. Sci. U. S. A.* 101, 9903–9908.
- 1185 Pohl, R. W., and Davidse, G. (1971). Chromosome Numbers of Costa Rican Grasses.  
1186 *Brittonia* 23, 293.
- 1187 Potter, S. C., Luciani, A., Eddy, S. R., Park, Y., Lopez, R., and Finn, R. D. (2018).  
1188 HMMER web server: 2018 update. *Nucleic Acids Res.* 46, W200–W204.
- 1189 Preston, J. C., Christensen, A., Malcomber, S. T., and Kellogg, E. A. (2009). MADS-box  
1190 gene expression and implications for developmental origins of the grass spikelet.  
1191 *Am. J. Bot.* 96, 1419–1429.
- 1192 Preston, J. C., and Kellogg, E. A. (2006). Reconstructing the evolutionary history of  
1193 paralogous APETALA1/FRUITFULL-like genes in grasses (Poaceae). *Genetics*  
1194 174, 421–437.
- 1195 Prysycz, L. P., and Gabaldón, T. (2016). Redundans: an assembly pipeline for highly

- 1196 heterozygous genomes. *Nucleic Acids Res.* 44, e113.
- 1197 Rodriguez Milla, M. A., Maurer, A., Rodriguez Huete, A., and Gustafson, J. P. (2003).  
1198 Glutathione peroxidase genes in Arabidopsis are ubiquitous and regulated by  
1199 abiotic stresses through diverse signaling pathways. *Plant J.* 36, 602–615.
- 1200 Rothfels, C. J. (2021). Polyploid phylogenetics. *New Phytol.* 230, 66–72 .
- 1201 Saarela, J. M., Burke, S. V., Wysocki, W. P., Barrett, M. D., Clark, L. G., Craine, J. M.,  
1202 et al. (2018). A 250 plastome phylogeny of the grass family (Poaceae): topological  
1203 support under different data partitions. *PeerJ* 6, e4299.
- 1204 Sajo, M. D. G., Furness, C. A., and Rudall, P. J. (2009). Microsporogenesis is  
1205 simultaneous in the early-divergent grass *Streptochaeta*, but successive in the  
1206 closest grass relative, *Ecdeiocolea*. *Grana* 48, 27–37.
- 1207 Sajo, M. G., Longhi-Wagner, H. M., and Rudall, P. J. (2008). Reproductive morphology  
1208 of the early-divergent grass *Streptochaeta* and its bearing on the homologies of the  
1209 grass spikelet. *Plant Syst. Evol.* 275, 245.
- 1210 Sajo, M. G., Longhi-Wagner, H., and Rudall, P. J. (2007). Floral Development and  
1211 Embryology in the Early-Divergent Grass *Pharus*. *Int. J. Plant Sci.* 168, 181–191.
- 1212 Sajo, M. G., Pabón-Mora, N., Jardim, J., Stevenson, D. W., and Rudall, P. J. (2012).  
1213 Homologies of the flower and inflorescence in the early-divergent grass  
1214 *Anomochloa* (Poaceae). *Am. J. Bot.* 99, 614–628.
- 1215 Salse, J., Bolot, S., Throude, M., Jouffe, V., Piegu, B., Quraishi, U. M., et al. (2008).  
1216 Identification and characterization of shared duplications between rice and wheat  
1217 provide new insight into grass genome evolution. *Plant Cell* 20, 11–24.
- 1218 Sarwar, H. (2013). The importance of cereals (Poaceae: Gramineae) nutrition in human  
1219 health: A review. *J. Cereals Oilseeds* 4, 32–35.
- 1220 Scanlon, M. J., Schneeberger, R. G., and Freeling, M. (1996). The maize mutant narrow  
1221 sheath fails to establish leaf margin identity in a meristematic domain. *Development*  
1222 122, 1683–1691.
- 1223 Schmidt, R., Schippers, J. H. M., Mieulet, D., Obata, T., Fernie, A. R., Guiderdoni, E., et  
1224 al. (2013). MULTIPASS, a rice R2R3-type MYB transcription factor, regulates  
1225 adaptive growth by integrating multiple hormonal pathways. *Plant J.* 76, 258–273.
- 1226 Seetharam, A., Singh, U., Li, J., Bhandary, P., Arendsee, Z., and Wurtele, E. S. (2019).  
1227 Maximizing prediction of orphan genes in assembled genomes. *bioRxiv*  
1228 doi:10.1101/2019.12.17.880294.
- 1229 Simão, F. A., Waterhouse, R. M., Ioannidis, P., Kriventseva, E. V., and Zdobnov, E. M.  
1230 (2015). BUSCO: assessing genome assembly and annotation completeness with



- 1231 single-copy orthologs. *Bioinformatics* 31, 3210–3212.
- 1232 Soderstrom, T. R., and Ellis, R. P. (1987). “The position of bamboo genera and allies in  
1233 a system of grass classification,” in *Grass Systematics and Evolution*, eds. T. R.  
1234 Soderstrom, K. W. Hilu, C. S. Campbell, and M. E. Barkworth (Washington, DC:  
1235 Smithsonian Institution Press), 225–238.
- 1236 Soreng, R. J., Peterson, P. M., Romaschenko, K., Davidse, G., Teisher, J. K., Clark, L.  
1237 G., et al. (2017). A worldwide phylogenetic classification of the Poaceae  
1238 (Gramineae) II: An update and a comparison of two 2015 classifications:  
1239 Phylogenetic classification of the grasses II. *J. Syst. Evol.* 55, 259–290.
- 1240 Spriggs, E. L., Christin, P.-A., and Edwards, E. J. (2014). C4 photosynthesis promoted  
1241 species diversification during the Miocene grassland expansion. *PLoS One* 9,  
1242 e97722.
- 1243 Suyama, M., Torrents, D., and Bork, P. (2006). PAL2NAL: robust conversion of protein  
1244 sequence alignments into the corresponding codon alignments. *Nucleic Acids Res.*  
1245 34, W609–12.
- 1246 Teng, C., Zhang, H., Hammond, R., Huang, K., Meyers, B. C., and Walbot, V. (2020).  
1247 Dicer-like 5 deficiency confers temperature-sensitive male sterility in maize. *Nat.*  
1248 *Commun.* 11, 2912.
- 1249 Thody, J., Folkes, L., Medina-Calzada, Z., Xu, P., Dalmay, T., and Moulton, V. (2018).  
1250 PAREsnip2: a tool for high-throughput prediction of small RNA targets from  
1251 degradome sequencing data using configurable targeting rules. *Nucleic Acids Res.*  
1252 46, 8730–8739.
- 1253 Tsuji, H., Aya, K., Ueguchi-Tanaka, M., Shimada, Y., Nakazono, M., Watanabe, R., et  
1254 al. (2006). GAMYB controls different sets of genes and is differentially regulated by  
1255 microRNA in aleurone cells and anthers. *Plant J.* 47, 427–444.
- 1256 UniProt Consortium (2021). UniProt: the universal protein knowledgebase in 2021.  
1257 *Nucleic Acids Res.* 49, D480–D489.
- 1258 UpSetR Github Available at: <https://github.com/hms-dbmi/UpSetR> [Accessed February  
1259 21, 2021].
- 1260 Valencia, J. I. (1962). Los cromosomas de *Streptochaeta spicata* Schrad. (Gramineae).  
1261 *Darwiniana* 12, 379–383.
- 1262 VanBuren, R., Man Wai, C., Wang, X., Pardo, J., Yocca, A. E., Wang, H., et al. (2020).  
1263 Exceptional subgenome stability and functional divergence in the allotetraploid  
1264 Ethiopian cereal teff. *Nat. Commun.* 11, 884.
- 1265 Velasco, R., Zharkikh, A., Affourtit, J., Dhingra, A., Cestaro, A., Kalyanaraman, A., et al.  
1266 (2010). The genome of the domesticated apple (*Malus × domestica* Borkh.). *Nat.*

- 1267            *Genet.* 42, 833–839.
- 1268    Venturini, L., Caim, S., Kaithakottil, G. G., Mapleson, D. L., and Swarbreck, D. (2018).  
1269            Leveraging multiple transcriptome assembly methods for improved gene structure  
1270            annotation. *Gigascience* 7, giy093.
- 1271    Walbot, V., and Egger, R. L. (2016). Pre-Meiotic Anther Development: Cell Fate  
1272            Specification and Differentiation. *Annu. Rev. Plant Biol.* 67, 365–395.
- 1273    Wang, J., Yu, J., Sun, P., Li, Y., Xia, R., Liu, Y., et al. (2016). Comparative Genomics  
1274            Analysis of Rice and Pineapple Contributes to Understand the Chromosome  
1275            Number Reduction and Genomic Changes in Grasses. *Front. Genet.* 7, 174.
- 1276    Wang, X., Shi, X., Hao, B., Ge, S., and Luo, J. (2005). Duplication and DNA segmental  
1277            loss in the rice genome: implications for diploidization. *New Phytol.* 165, 937–946.
- 1278    Whipple, C. J. (2017). Grass inflorescence architecture and evolution: the origin of novel  
1279            signaling centers. *New Phytol.* 216, 367–372.
- 1280    Whipple, C. J., Zanis, M. J., Kellogg, E. A., and Schmidt, R. J. (2007). Conservation of B  
1281            class gene expression in the second whorl of a basal grass and outgroups links the  
1282            origin of lodicules and petals. *Proc. Natl. Acad. Sci. U. S. A.* 104, 1081–1086.
- 1283    White, R. P., Murray, S., Rohweder, M., Prince, S. D., Thompson, K. M., and Others  
1284            (2000). *Grassland ecosystems*. World Resources Institute Washington, DC, USA.
- 1285    Xia, R., Xu, J., and Meyers, B. C. (2017). The Emergence, Evolution, and Diversification  
1286            of the miR390-TAS3-ARF Pathway in Land Plants. *Plant Cell* 29, 1232–1247.
- 1287    Yu, Y., Woo, M.-O., Rihua, P., and Koh, H.-J. (2020). The DROOPING LEAF (DR) gene  
1288            encoding GDSL esterase is involved in silica deposition in rice (*Oryza sativa* L.).  
1289            *PLoS One* 15, e0238887.
- 1290    Zhai, J., Arikait, S., Simon, S. A., Kingham, B. F., and Meyers, B. C. (2014). Rapid  
1291            construction of parallel analysis of RNA end (PARE) libraries for Illumina  
1292            sequencing. *Methods* 67, 84–90.
- 1293    Zhai, J., Zhang, H., Arikait, S., Huang, K., Nan, G.-L., Walbot, V., et al. (2015).  
1294            Spatiotemporally dynamic, cell-type-dependent premeiotic and meiotic phasiRNAs  
1295            in maize anthers. *Proc. Natl. Acad. Sci. U. S. A.* 112, 3146–3151.
- 1296    Zhang, H., Liang, W., Yang, X., Luo, X., Jiang, N., Ma, H., et al. (2010). Carbon starved  
1297            anther encodes a MYB domain protein that regulates sugar partitioning required for  
1298            rice pollen development. *Plant Cell* 22, 672–689.
- 1299    Zhang, R.-G., Wang, Z.-X., Ou, S., and Li, G.-Y. (2019). TESorter: lineage-level  
1300            classification of transposable elements using conserved protein domains. *bioRxiv*,  
1301            doi:10.1101/800177.

- 1302 Zhang, R., Huang, S., Li, S., Song, G., Li, Y., Li, W., et al. (2020). Evolution of PHAS  
1303 loci in the young spike of Allohexaploid wheat. *BMC Genomics* 21, 200.
- 1304 Zhou, Y., Lu, D., Li, C., Luo, J., Zhu, B.-F., Zhu, J., et al. (2012). Genetic control of seed  
1305 shattering in rice by the APETALA2 transcription factor shattering abortion1. *Plant*  
1306 *Cell* 24, 1034–1048.
- 1307 Zhu, J., Chen, H., Li, H., Gao, J.-F., Jiang, H., Wang, C., et al. (2008). Defective in  
1308 Tapetal development and function 1 is essential for anther development and tapetal  
1309 function for microspore maturation in Arabidopsis. *Plant J.* 55, 266–277.
- 1310 Zimin, A. V., Marçais, G., Puiu, D., Roberts, M., Salzberg, S. L., and Yorke, J. A. (2013).  
1311 The MaSuRCA genome assembler. *Bioinformatics* 29, 2669–2677.
- 1312
